# Supplementary material for: How do density functionals affect the Hirshfeld atom refinement?
Source: Royal Society of Chemistry journal article supplement (doi:10.1039/d2cp04098k), 2022-12-22
Supplement: d2cp04098k2.pdf [file d2cp04098k2.pdf]

### Supplementary Information

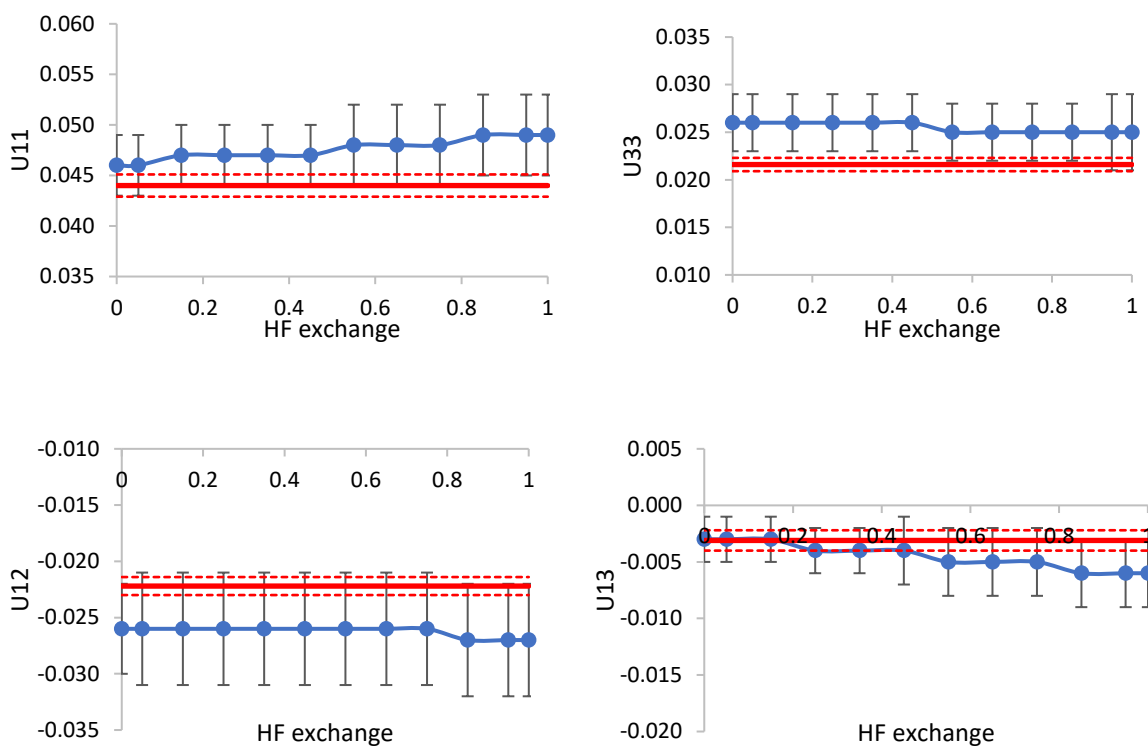

**Figure S1.** Unique ADPs for H1 atom of urea as a function of HF exchange, and associated std errors, refined at PBE<sub>ex</sub>/def2-TVZP level of theory. Neutron diffraction value is shown as a continue red line, and its associated std errors are shown with dashed red lines.

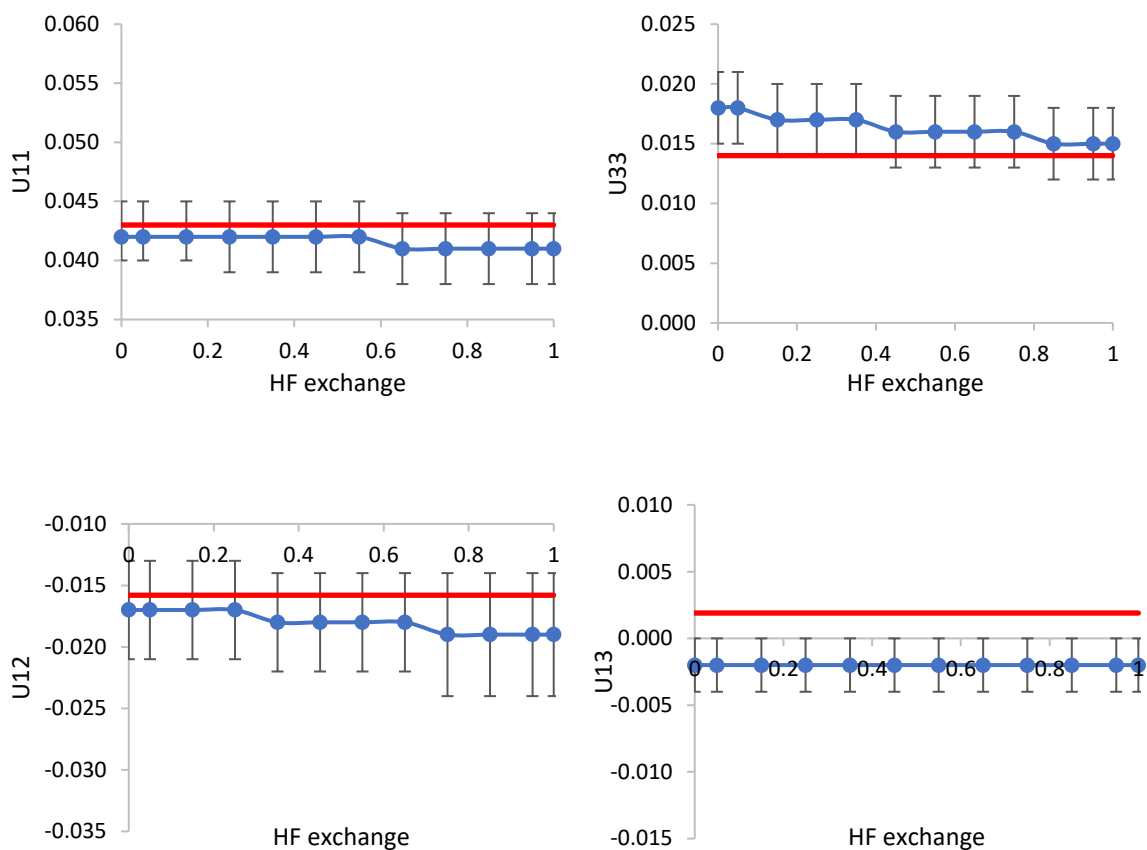

**Figure S2.** Unique ADPs for H2 atom of urea as a function of HF exchange, and associated std errors, refined at PBE<sub>ex</sub>/def2-TVZP level of theory. Neutron diffraction value is shown as a continue red line, and its associated std errors are shown with dashed red lines.

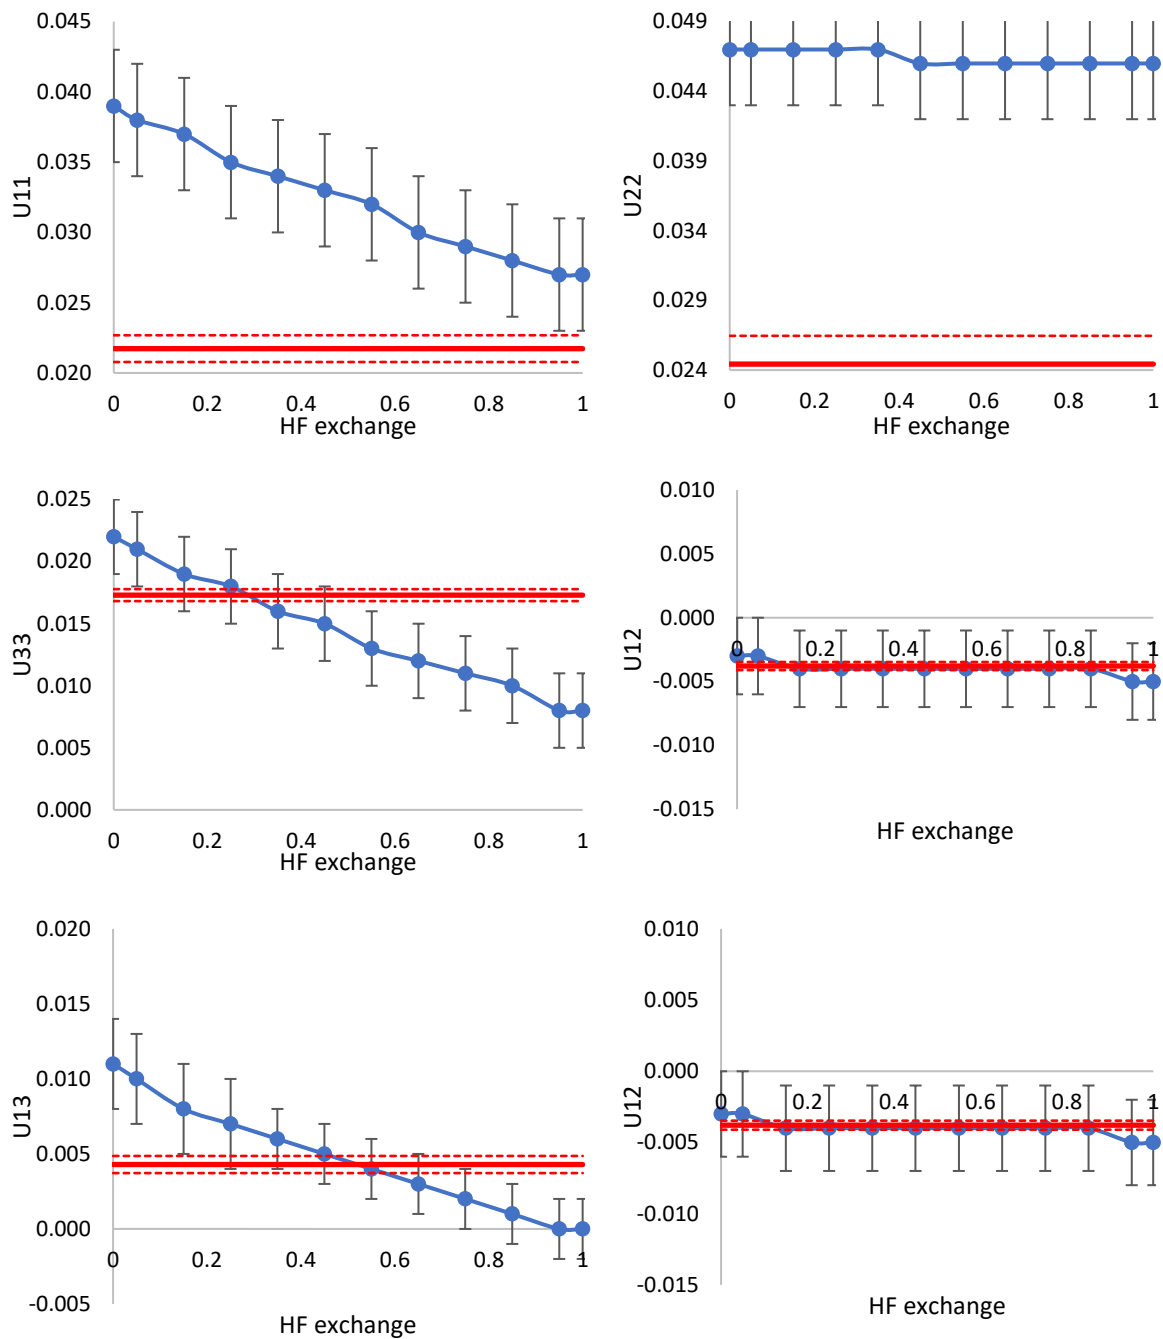

**Figure S3.** Unique ADPs for H1 atom of oxalic acid as a function of HF exchange, and associated std errors, refined at PBEx/def2-TVZP level of theory. The average newton diffraction value, obtained from the 14 diffraction data cited in the paper, is shown as a continuous red line, and its associated std errors are shown with dashed red lines.

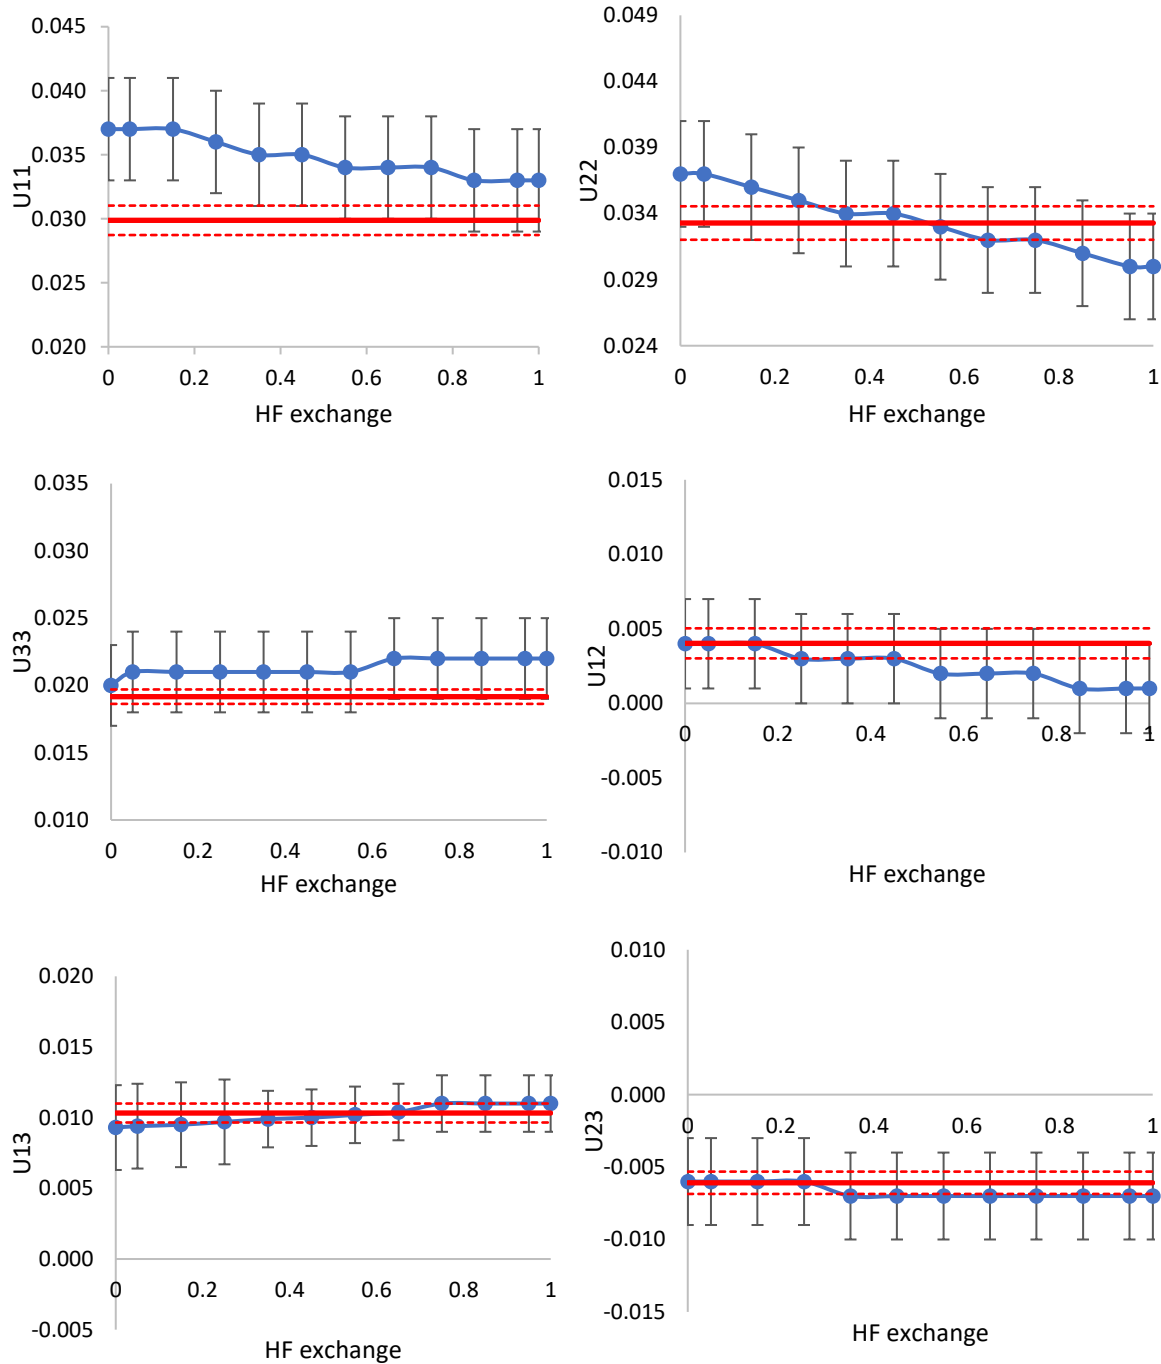

**Figure S4. Unique ADPs for H2 atom of oxalic acid as a function of HF exchange, and associated std errors, refined at PBE<sub>ex</sub>/def2-TVZP level of theory. The average newton diffraction value, obtained from the 14 diffraction data cited in the paper, is shown as a continuous red line, and its associated std errors are shown with dashed red lines.**

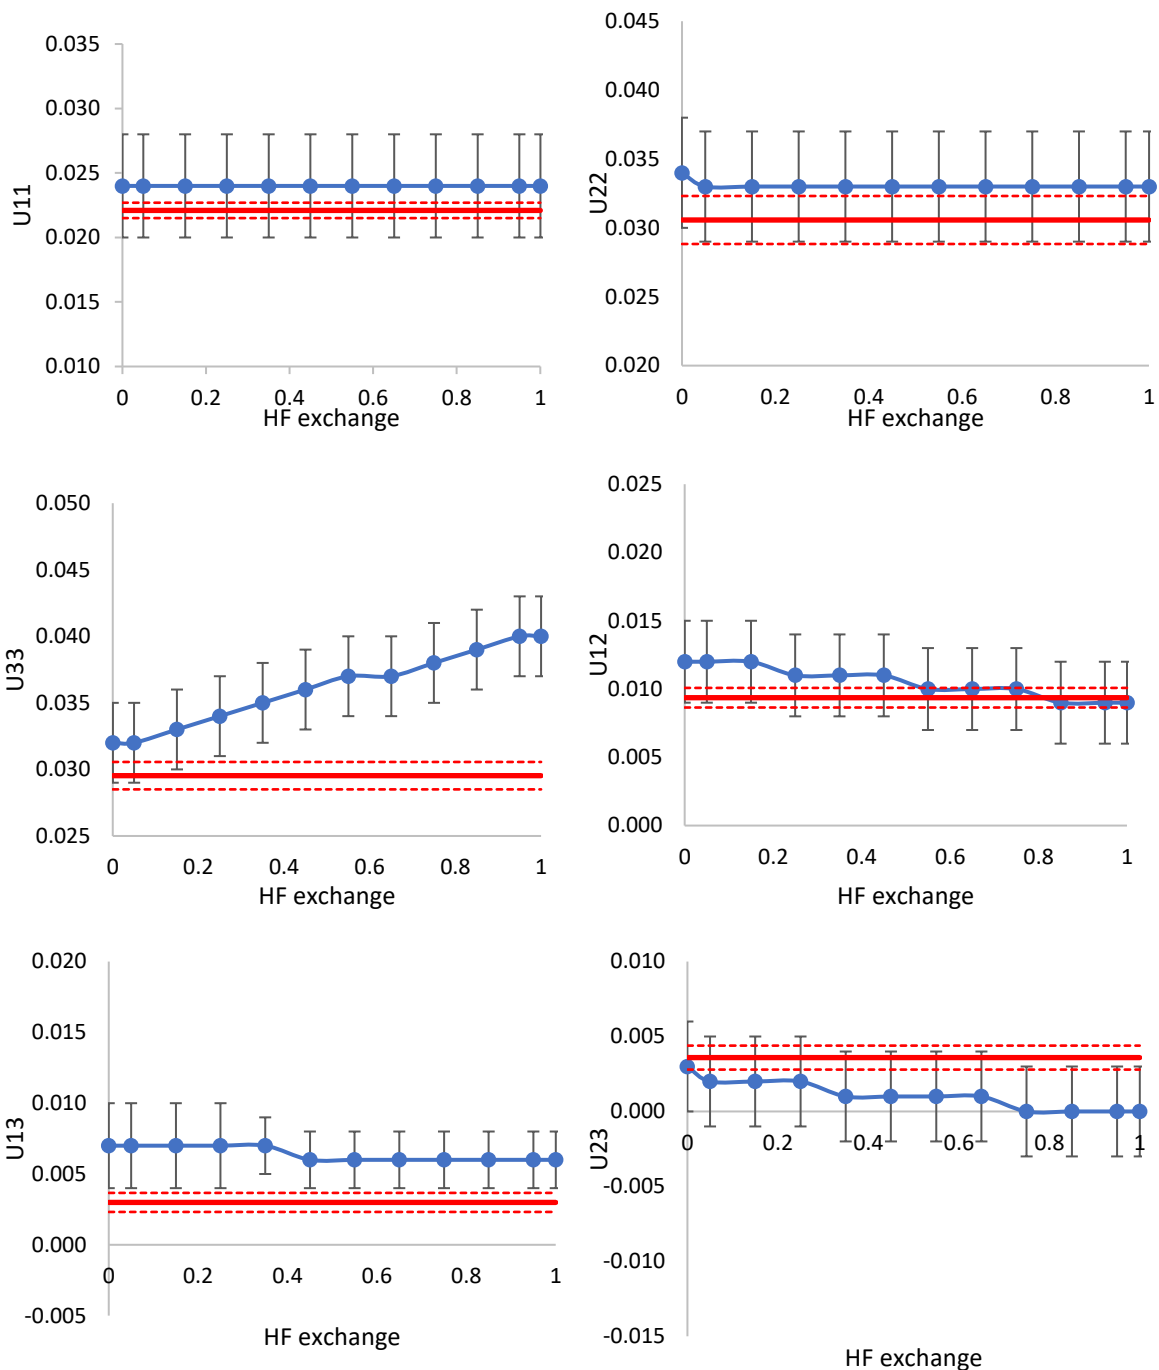

**Figure S5. Unique ADPs for H3 atom of oxalic acid as a function of HF exchange, and associated std errors, refined at PBE<sub>x</sub>/def2-TVZP level of theory. The average newton diffraction value, obtained from the 14 diffraction data cited in the paper, is shown as a continuous red line, and its associated std errors are shown with dashed red lines.**

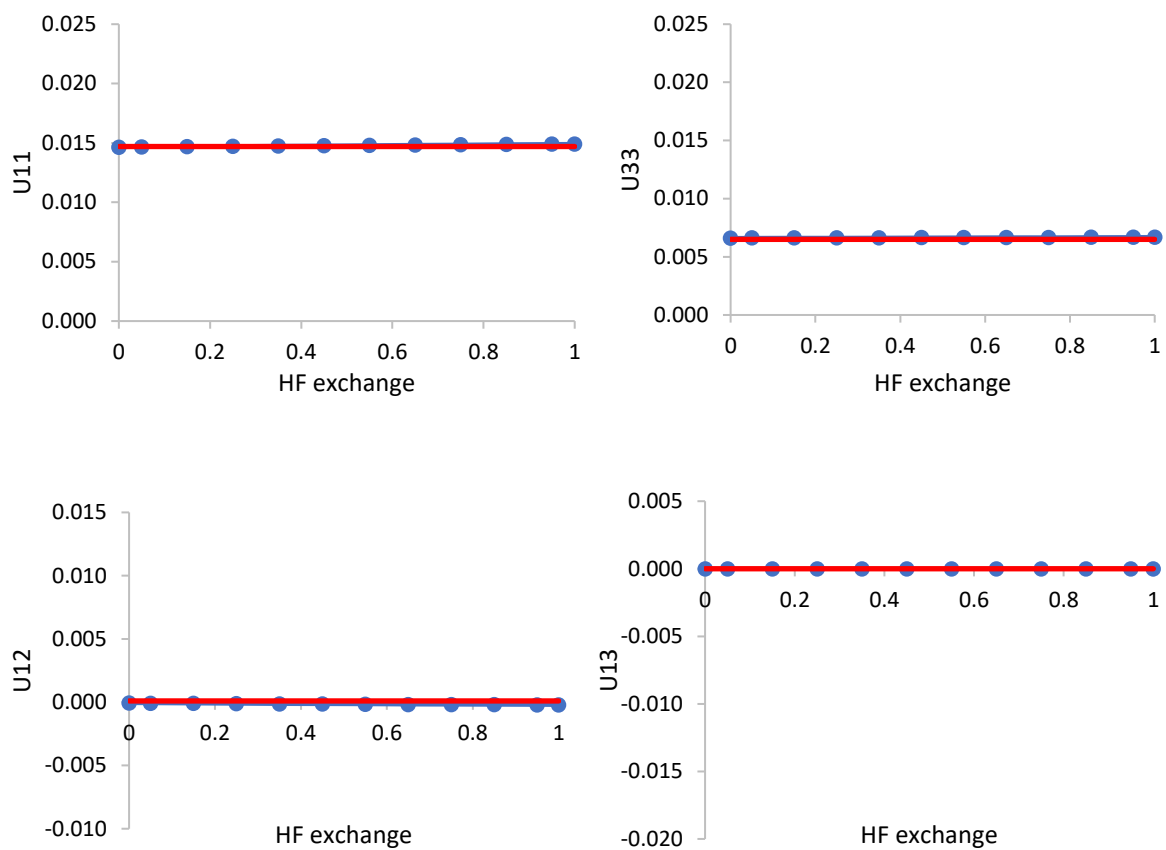

**Figure S6. Unique ADPs for C atom of urea as a function of HF exchange refined at PBE<sub>ex</sub>/def2-TVZP level of theory. Neutron diffraction value is shown as a continue red line. Std errors are of the order of magnitude of  $10^{-4}$  -  $10^{-5}$  Å<sup>-2</sup>, and not distinguishable at this scale.**

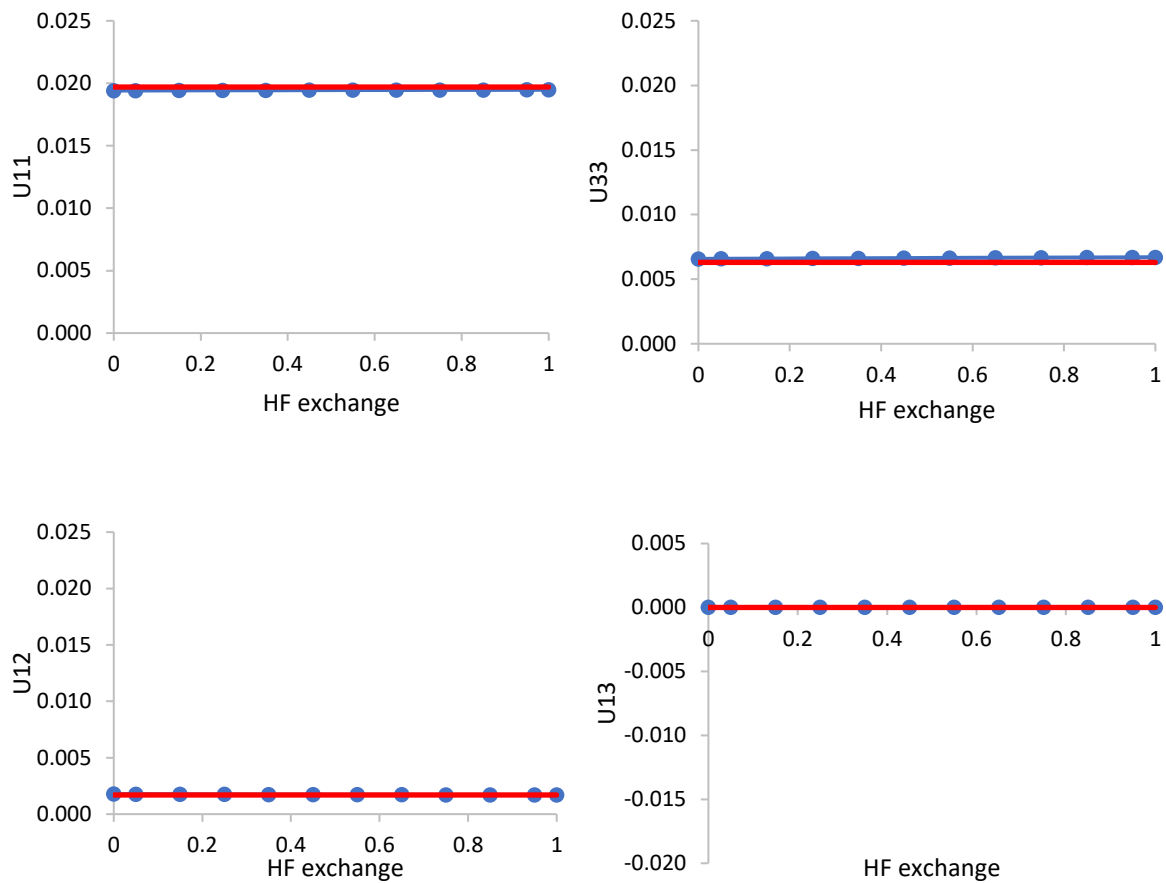

**Figure S7.** Unique ADPs for O atom of urea as a function of HF exchange refined at PBE<sub>ex</sub>/def2-TVZP level of theory. Neutron diffraction value is shown as a continue red line. Std errors are of the order of magnitude of  $10^{-4}$  -  $10^{-5}$  Å<sup>-2</sup>, and not distinguishable at this scale.

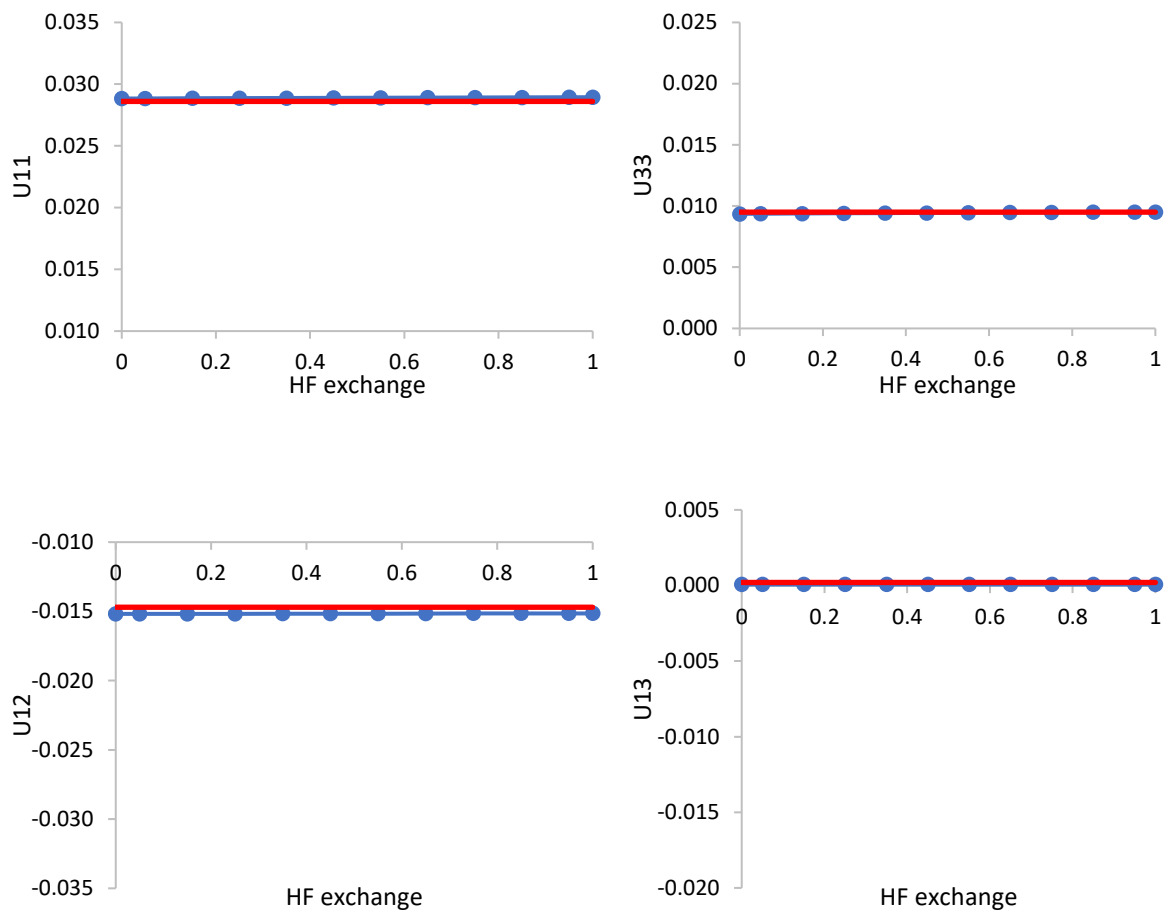

**Figure S8.** Unique ADPs for N atom of urea as a function of HF exchange refined at PBE<sub>x</sub>/def2-TVZP level of theory. Neutron diffraction value is shown as a continue red line. Std errors are of the order of magnitude of  $10^{-4}$  -  $10^{-5}$   $\text{\AA}^{-2}$ , and not distinguishable at this scale.



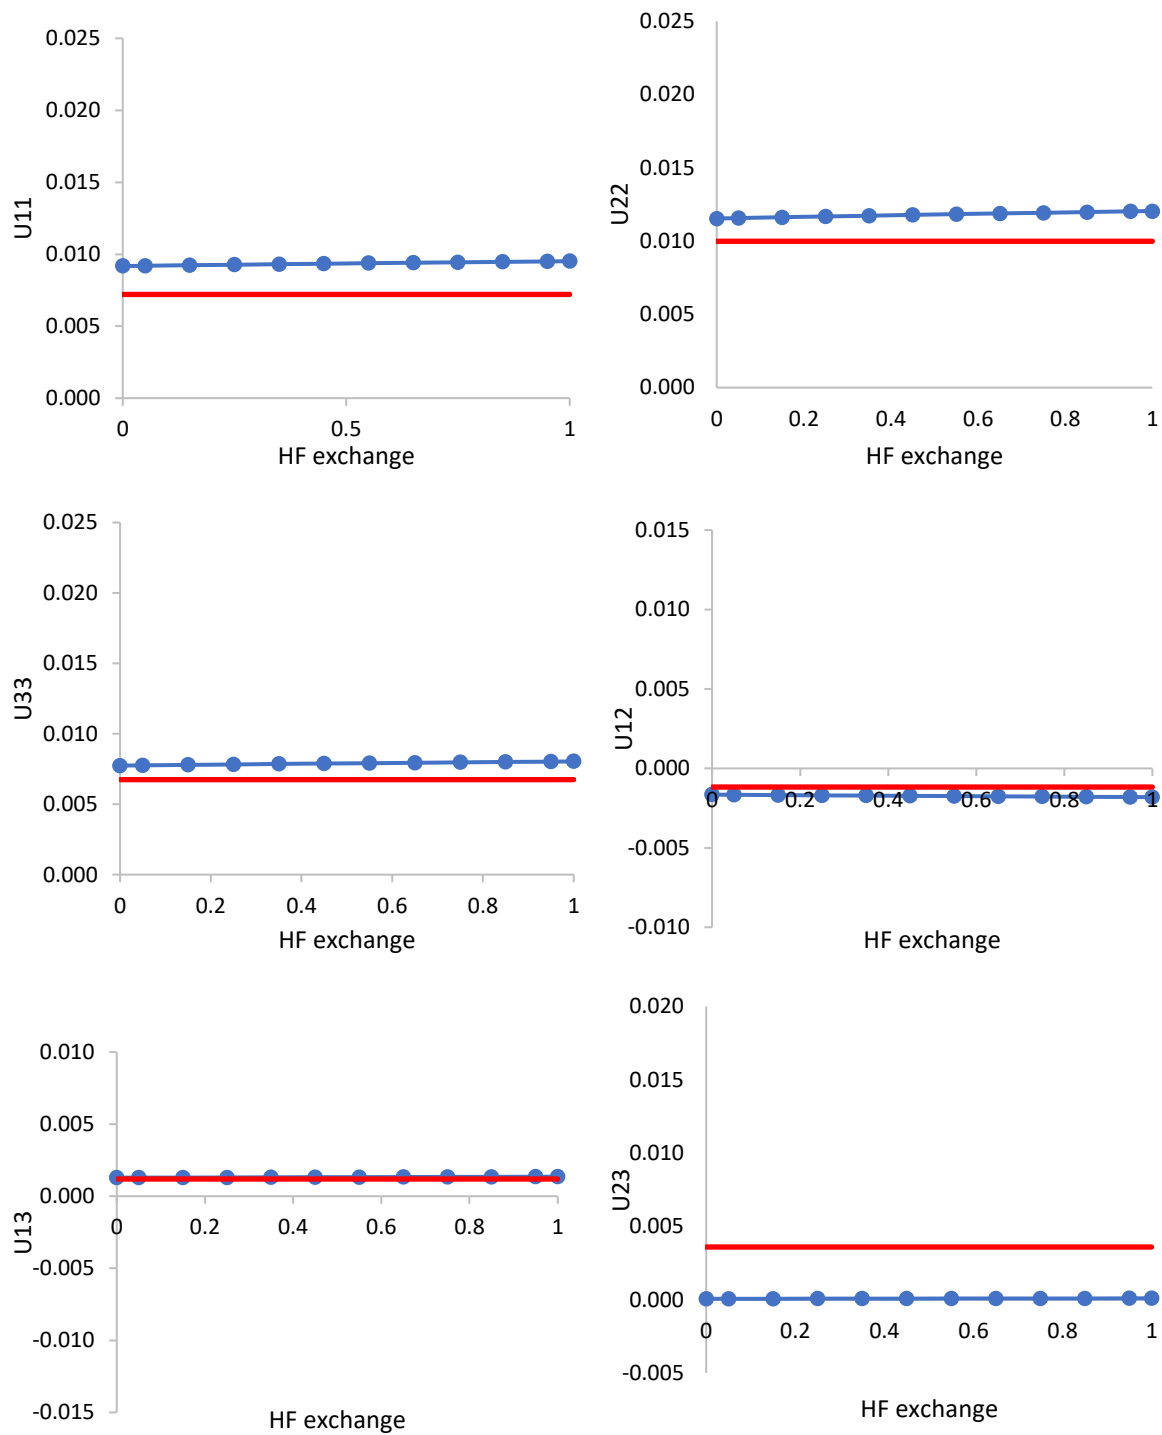

**Figure S9. Unique ADPs for C1 atom of urea as a function of HF exchange refined at PBE<sub>ex</sub>/def2-TVZP level of theory. Neutron diffraction value is shown as a continue red line. Std errors are of the order of magnitude of  $10^{-4}$  -  $10^{-5}$  Å<sup>-2</sup>, and not distinguishable at this scale.**

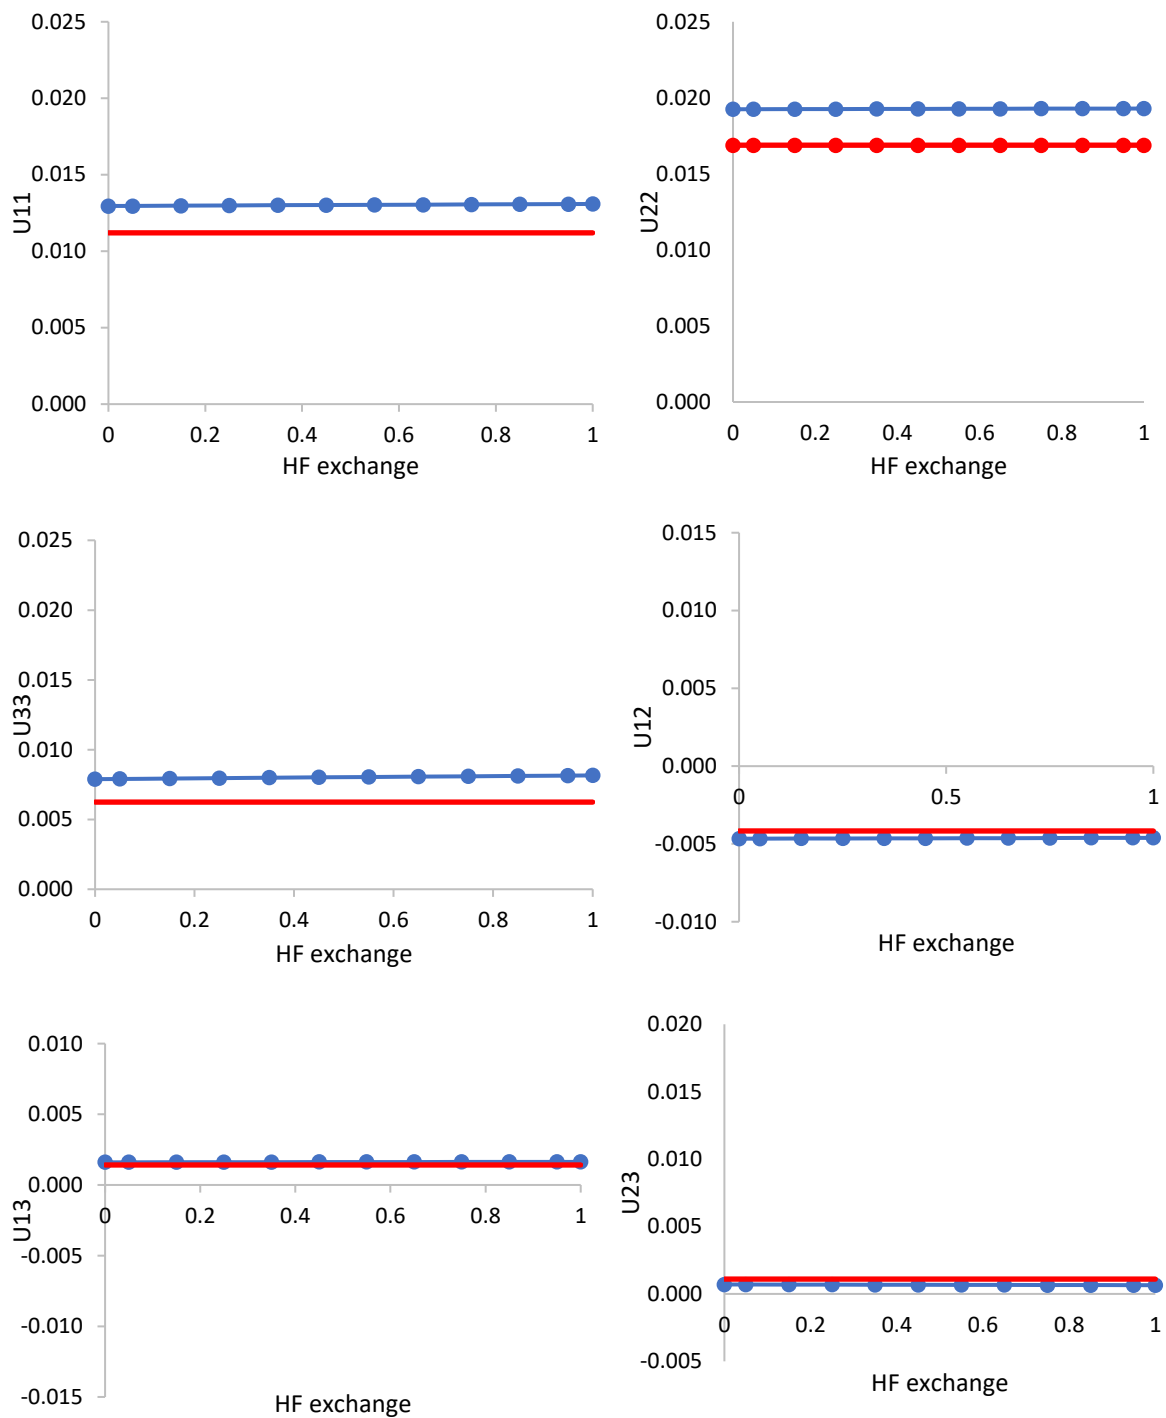

**Figure S10.** Unique ADPs for O1 atom of urea as a function of HF exchange refined at PBE<sub>ex</sub>/def2-TVZP level of theory. Neutron diffraction value is shown as a continue red line. Std errors are of the order of magnitude of  $10^{-4}$  -  $10^{-5}$  Å<sup>-2</sup>, and not distinguishable at this scale.

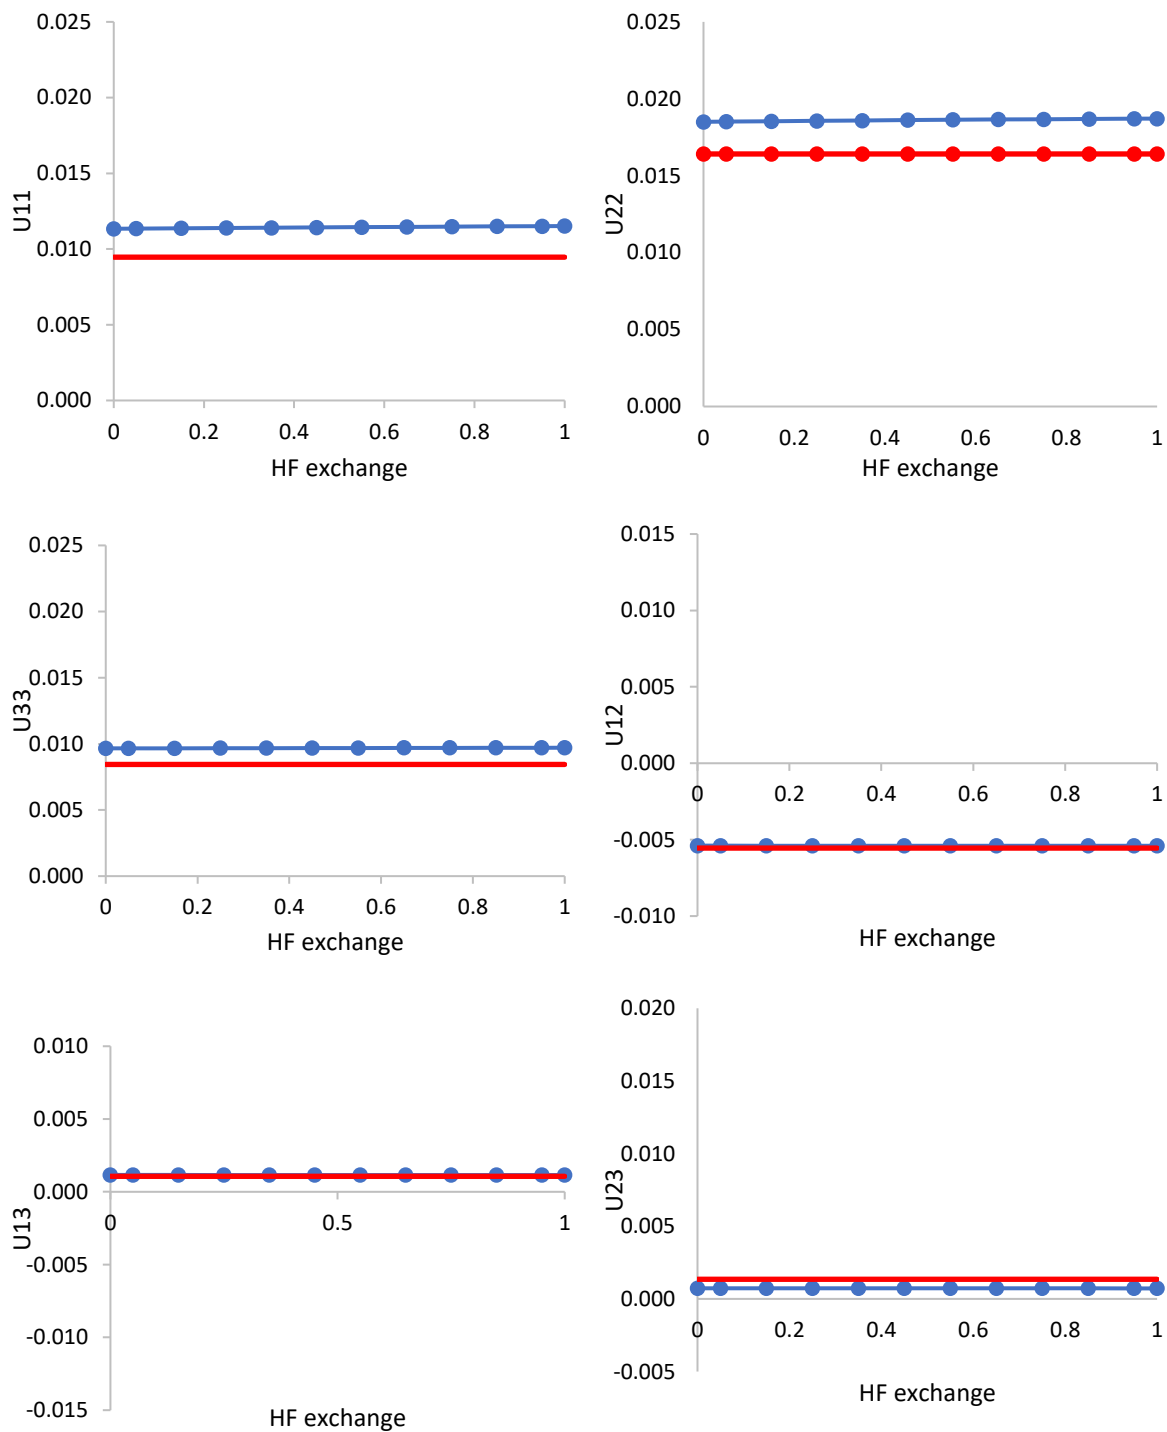

**Figure S11.** Unique ADPs for O2 atom of urea as a function of HF exchange refined at PBE<sub>ex</sub>/def2-TVZP level of theory. Neutron diffraction value is shown as a continue red line. Std errors are of the order of magnitude of  $10^{-4}$  -  $10^{-5} \text{ \AA}^{-2}$ , and not distinguishable at this scale.

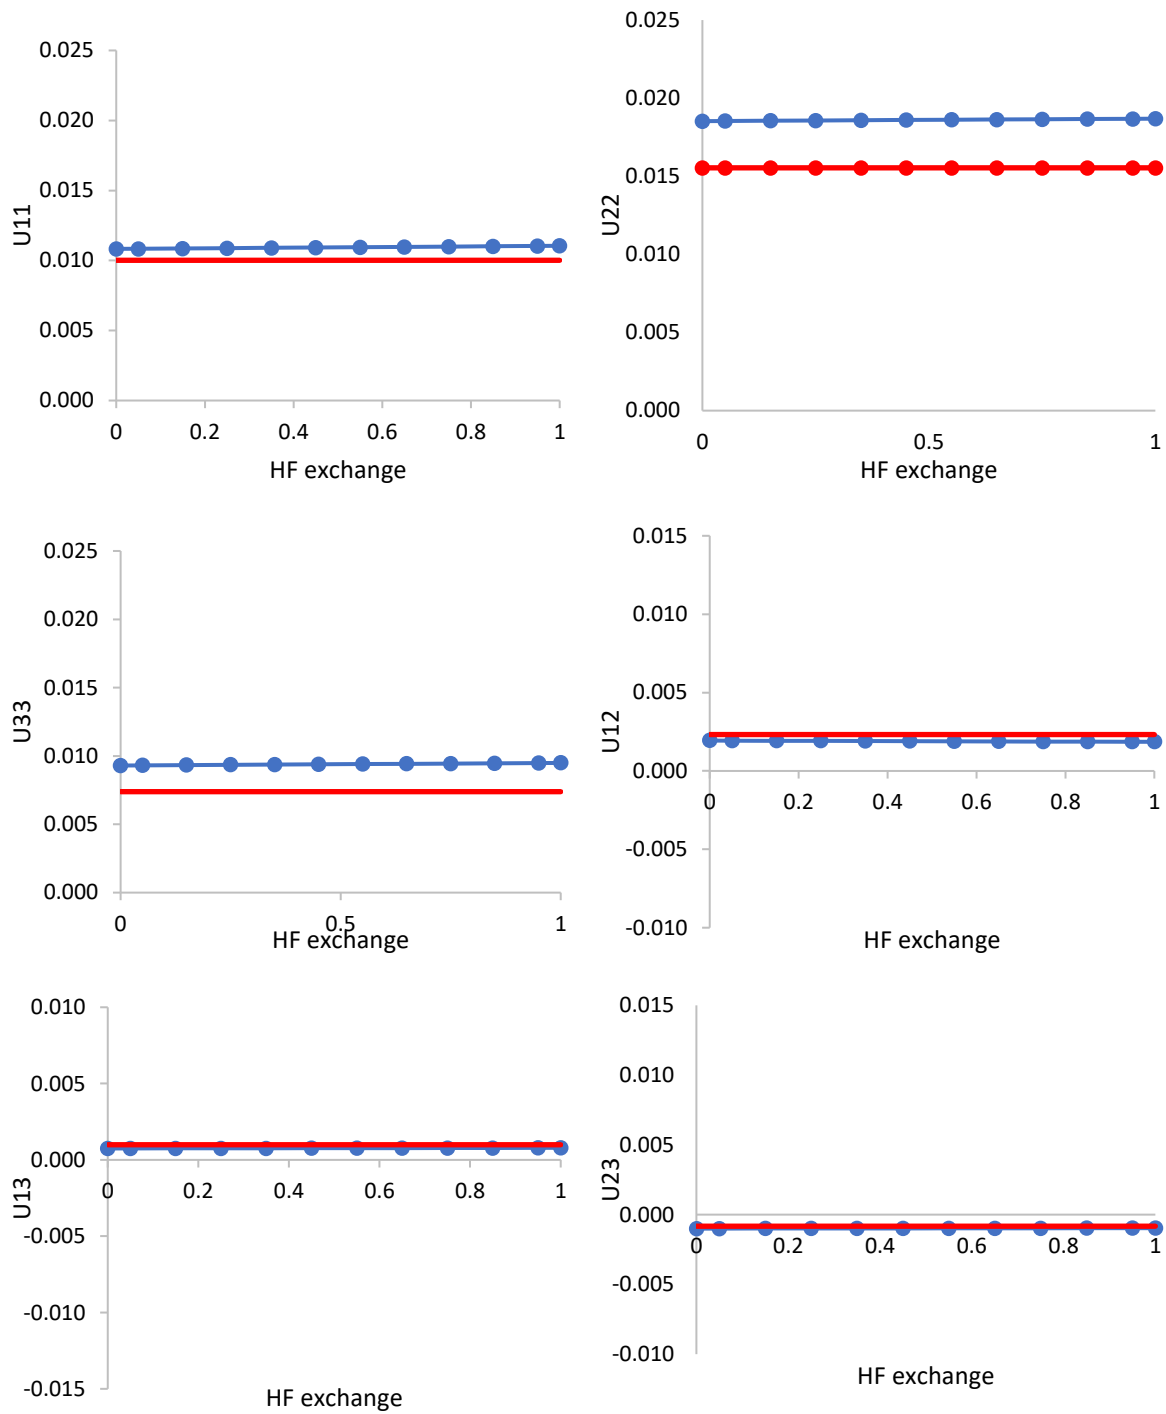

**Figure S12.** Unique ADPs for O3 atom of urea as a function of HF exchange refined at PBE<sub>x</sub>/def2-TVZP level of theory. Neutron diffraction value is shown as a continue red line. Std errors are of the order of magnitude of  $10^{-4} - 10^{-5} \text{ \AA}^{-2}$ , and not distinguishable at this scale.

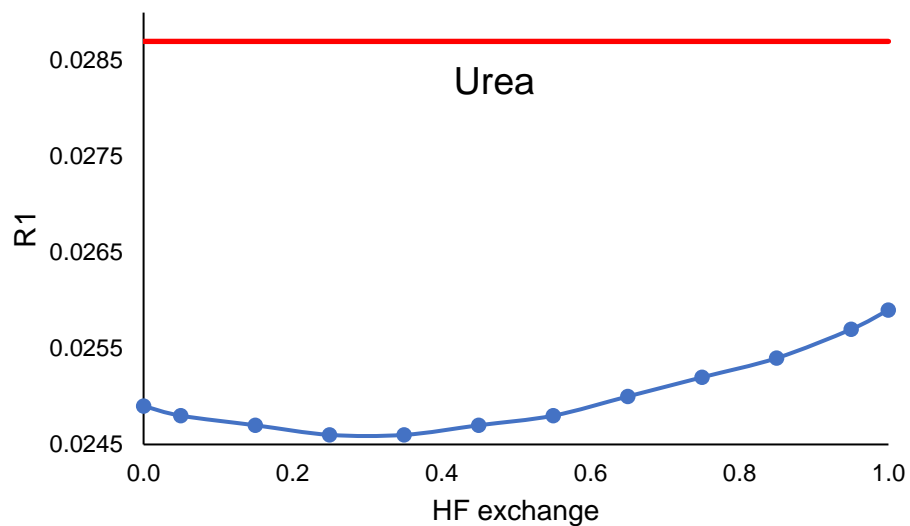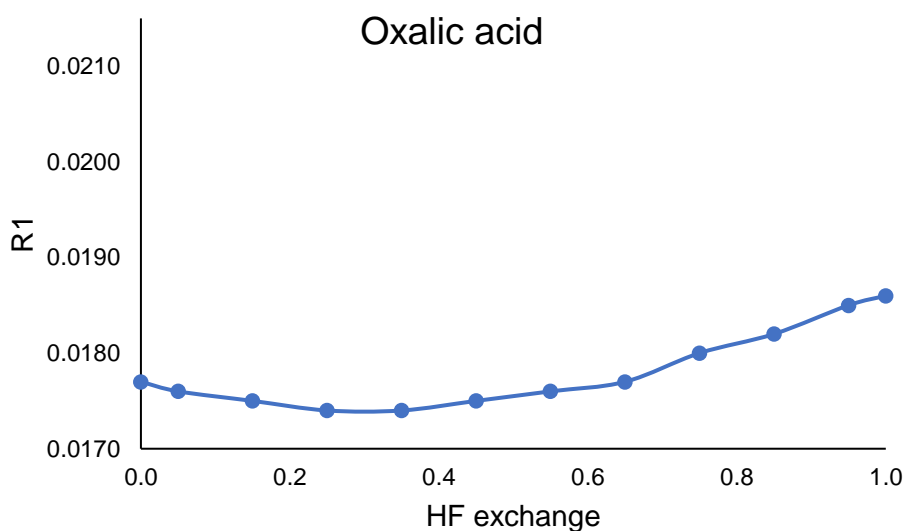

Figure S13.  $R_1$  of urea and oxalic acid as a function of HF exchanged refined at PBE<sub>ex</sub>/def2-TVZP level of theory. The value of IAM is shown as a continuous red line for urea. This value, which is 0.0268 for oxalic acid, is omitted for clarity purposes.

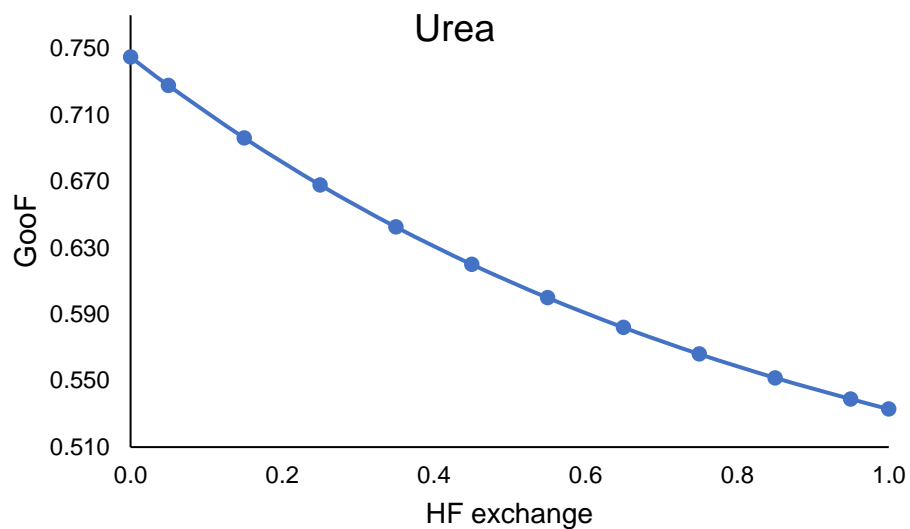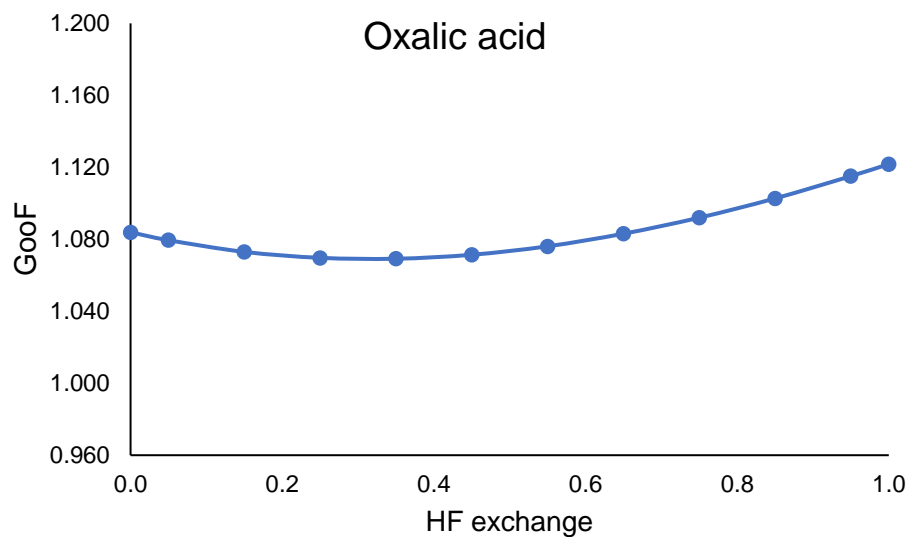

**Figure S14. Goof of urea and oxalic acid as a function of HF exchanged refined at PBEx/def2-TVZP level of theory.**

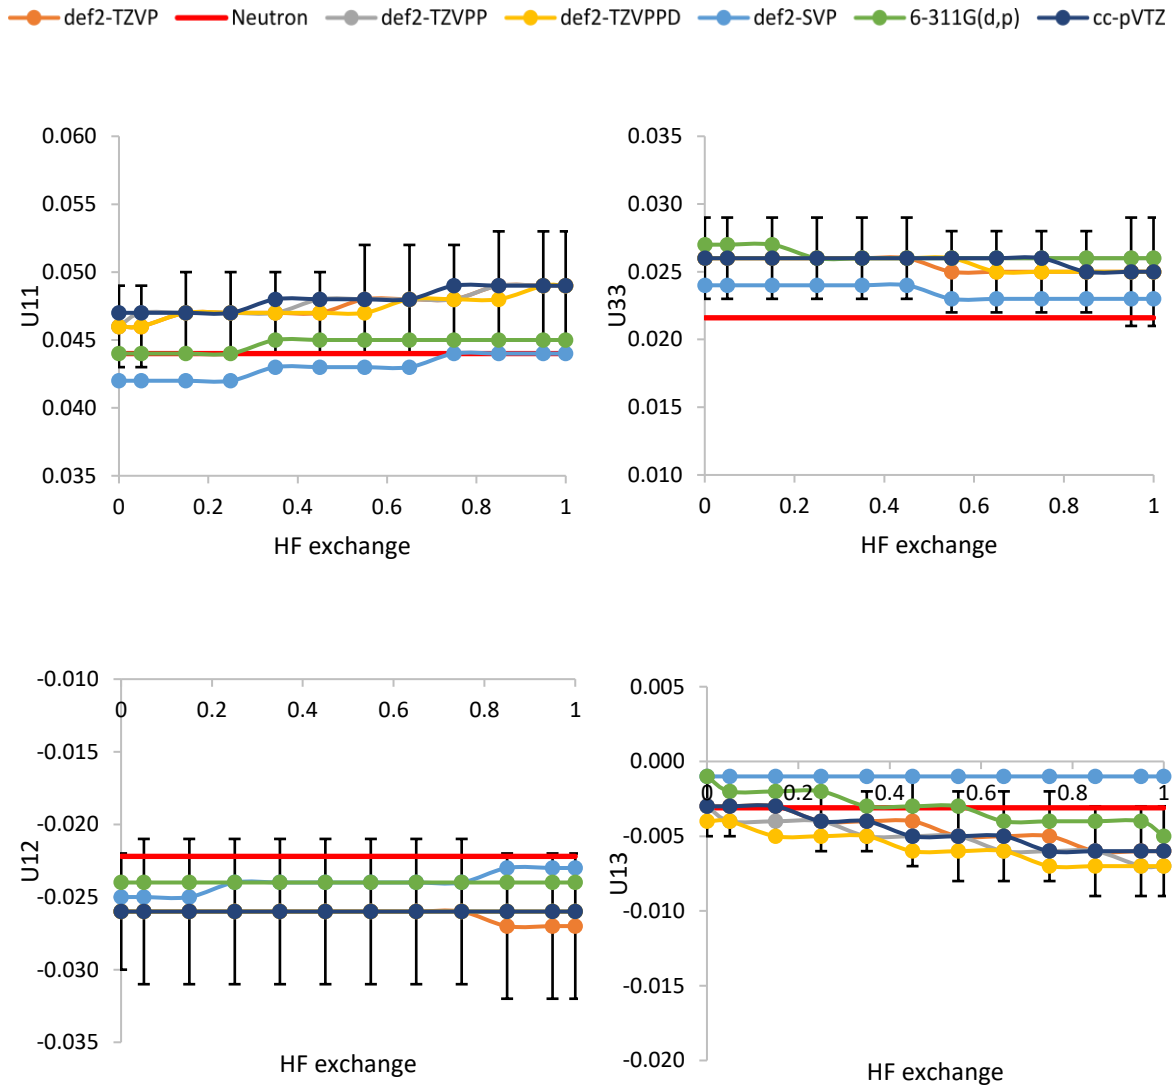

**Figure S15. Unique ADPs for H1 atom of urea as a function of HF exchange refined with PBE functional and several basis sets. Neutron diffraction value is shown as a continue red line. The std errors of the reference refinement (PBE/def2-TZVP) are shown.**

def2-TZVP Neutron def2-TZVPP def2-TZVPPD def2-SVP 6-311G(d,p) cc-pVTZ

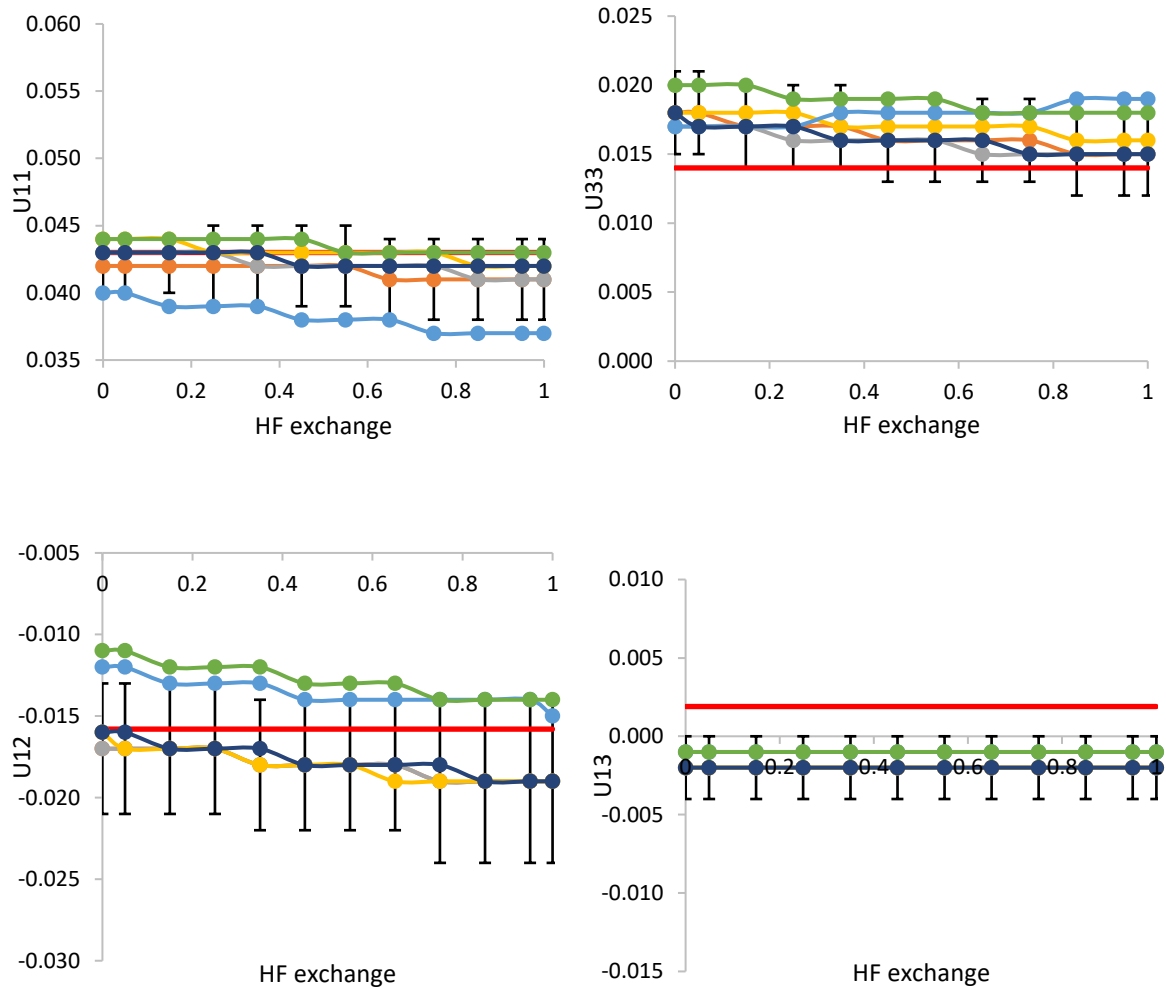

**Figure S16. Unique ADPs for H2 atom of urea as a function of HF exchange refined with PBEx functional and several basis sets. Neutron diffraction value is shown as a continue red line. The std errors of the reference refinement (PBEx/def2-TZVP) are shown.**



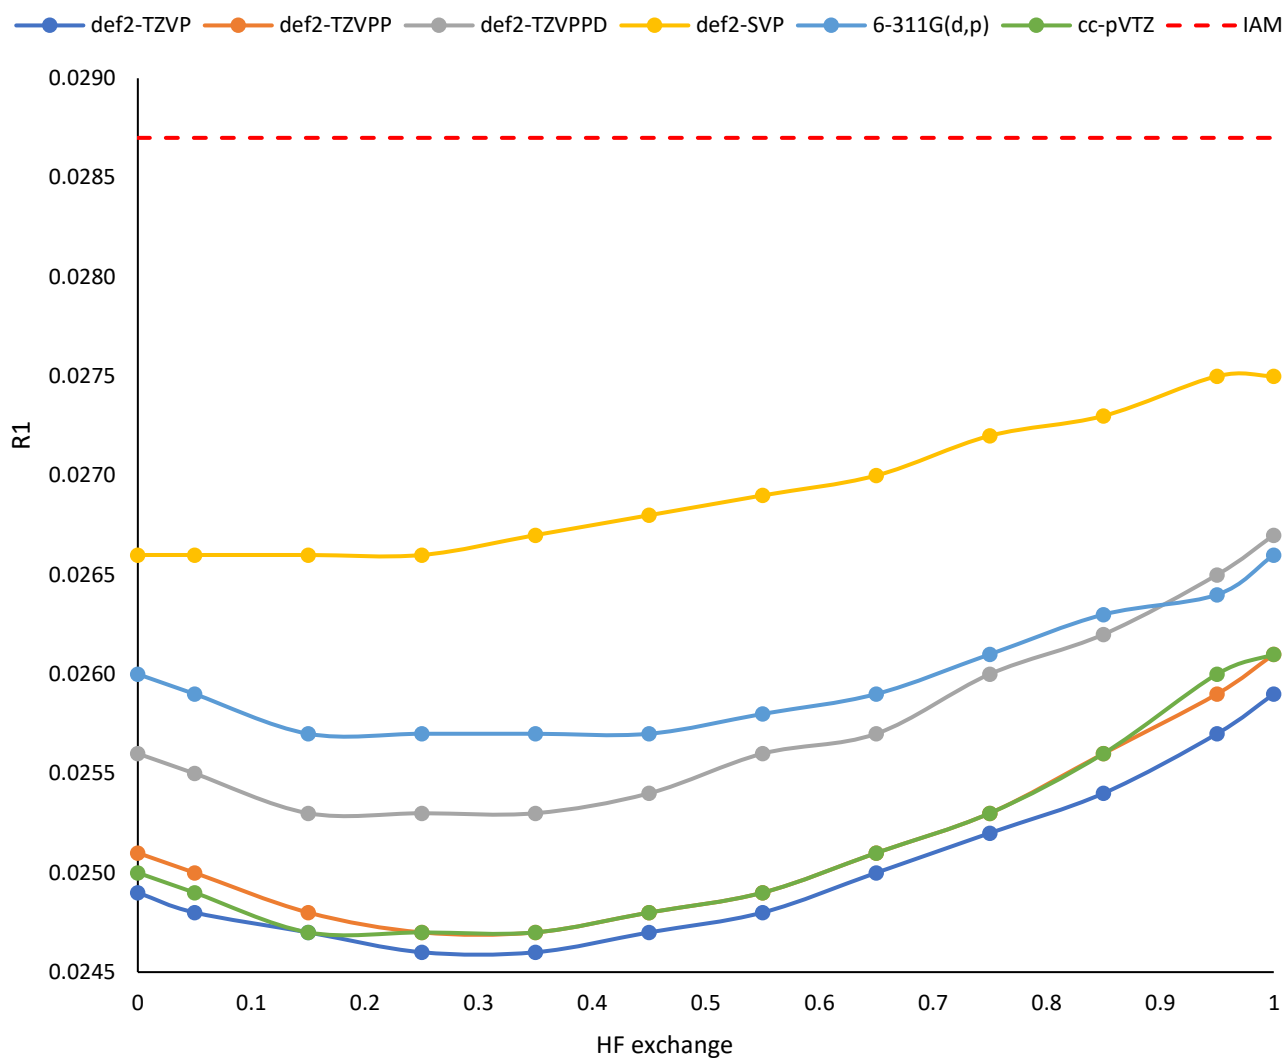

Figure S17. R1 of urea as a function of HF exchange refined with PBE functional and several basis sets. IAM value is shown as a dashed red line.

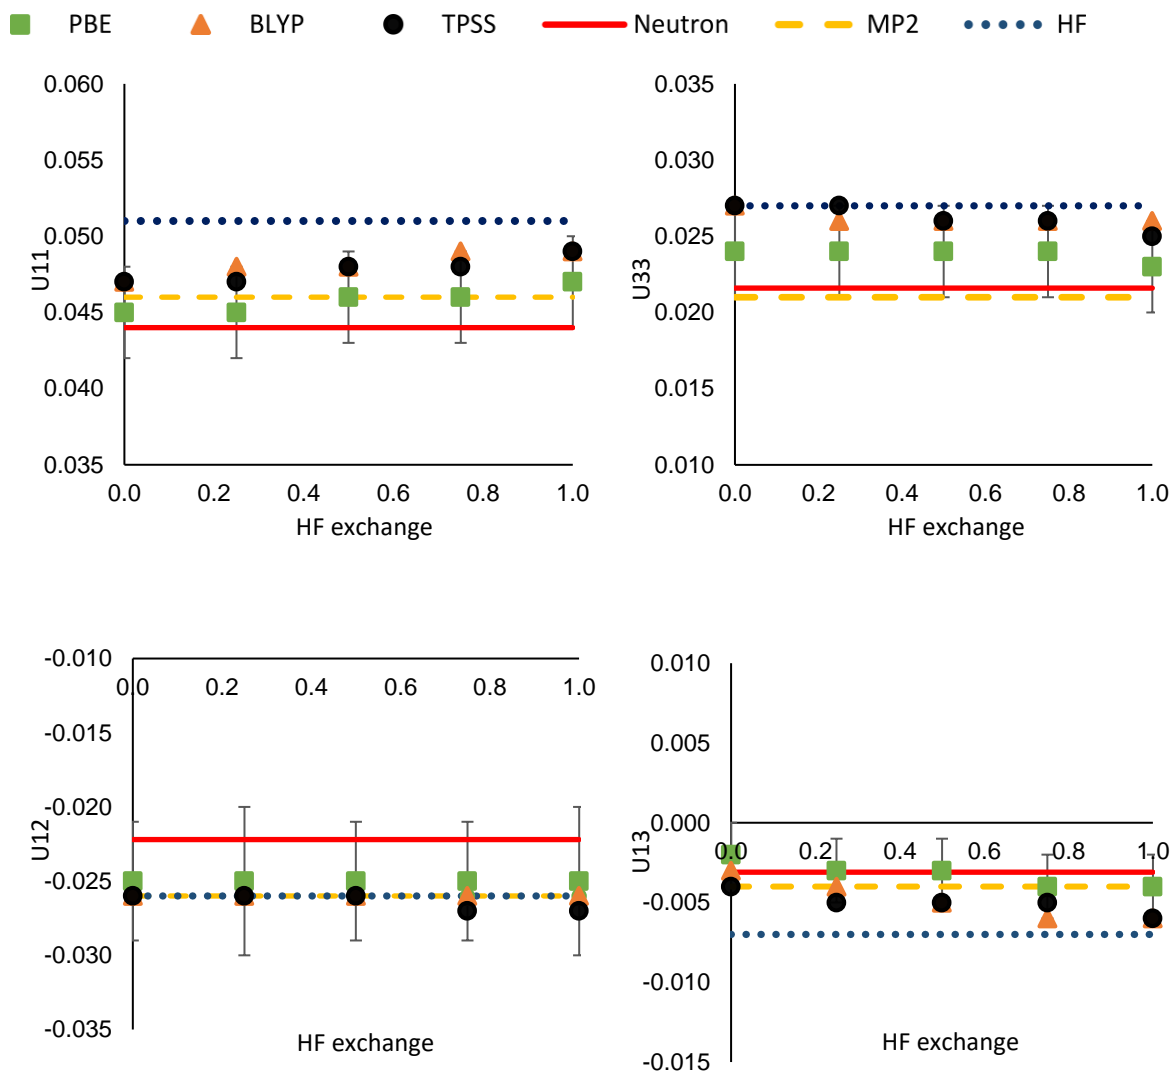

Figure S18. Unique ADPs for H1 atom of urea as a function of HF exchange refined with different levels of theory. Neutron diffraction value is shown as a continue red line. The std errors of the reference refinement (PBE/def2-TZVP) are shown.

■ PBE    ▲ BLYP    ● TPSS    — Neutron    - - - MP2    ⋯ HF

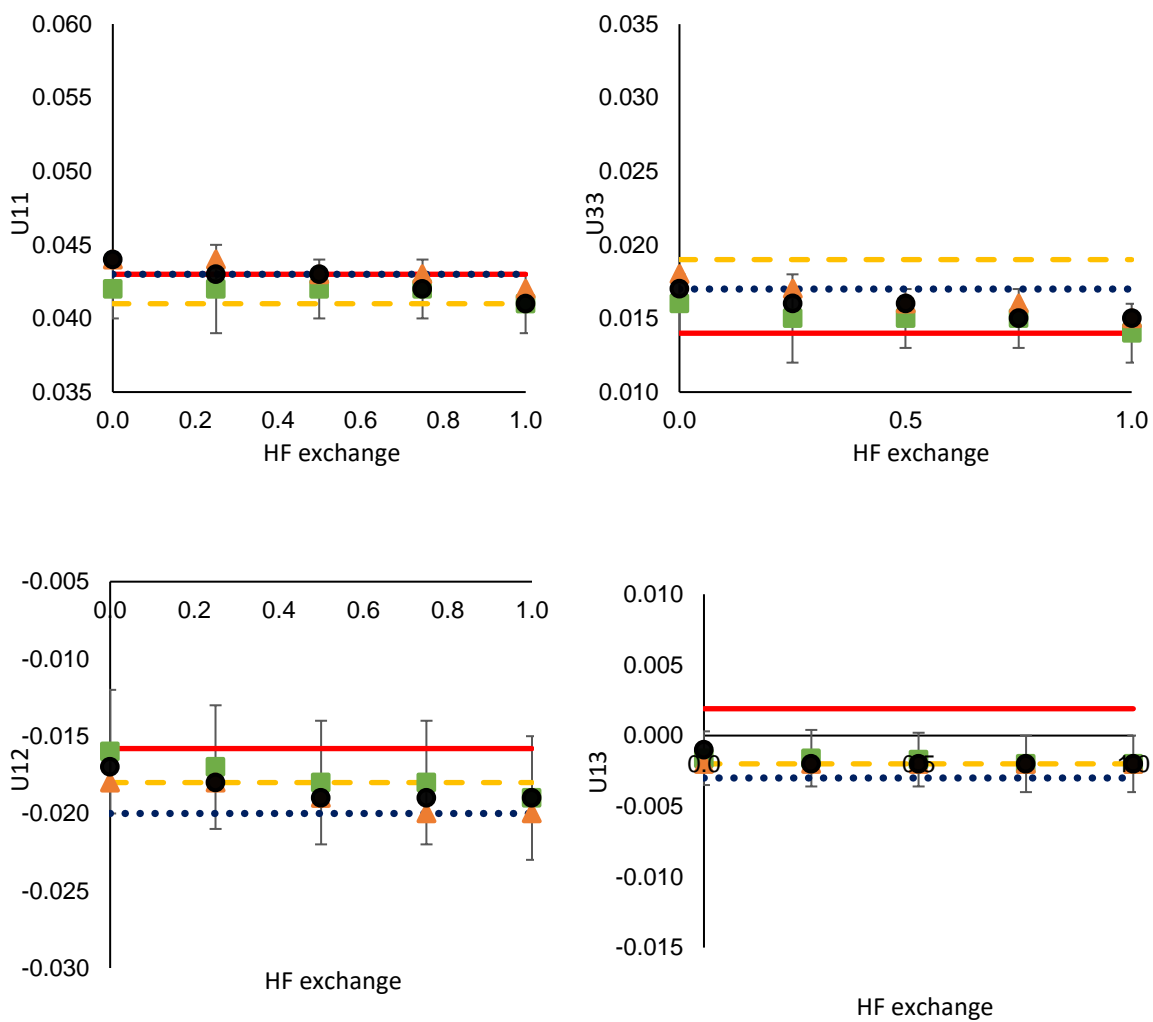

**Figure S19.** Unique ADPs for H2 atom of urea as a function of HF exchange refined with different levels of theory. Neutron diffraction value is shown as a continue red line. The std errors of the reference refinement (PBE/def2-TZVP) are shown.

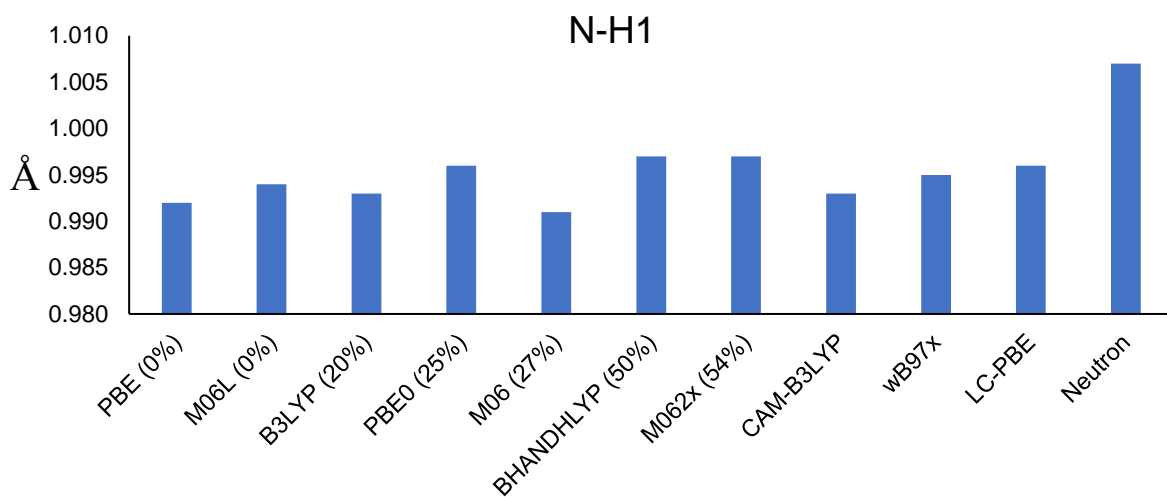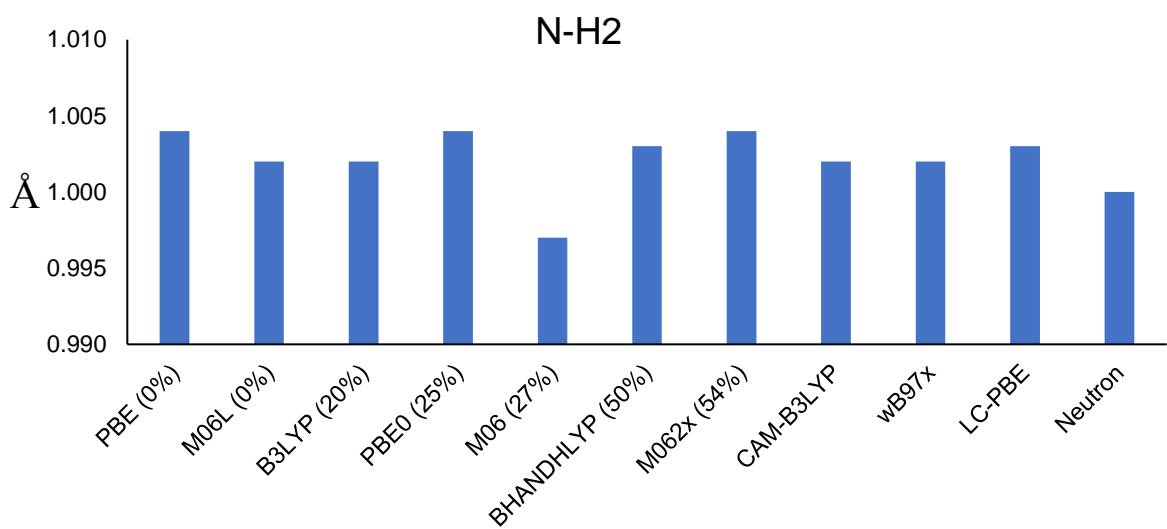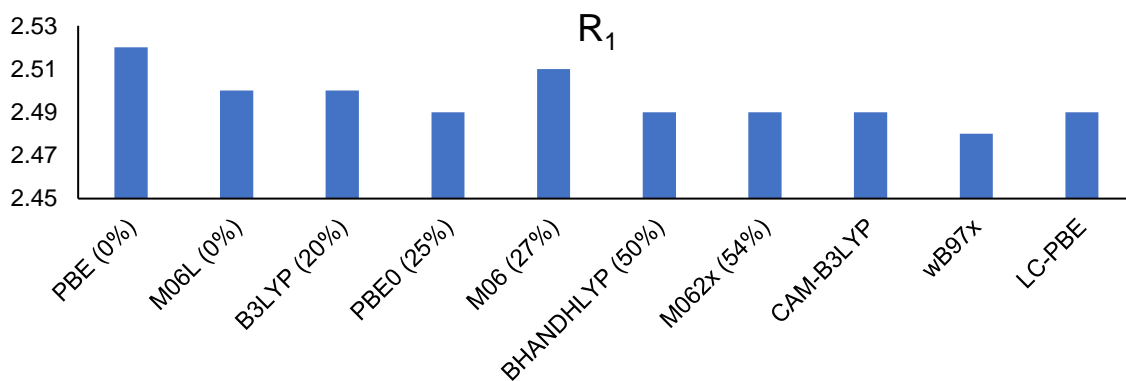

**Figure S20. N-H1 (top) and N-H2 (middle) distances refined with different density functionals and the def2-TZVP basis set. The corresponding  $R_1$  values (bottom).**

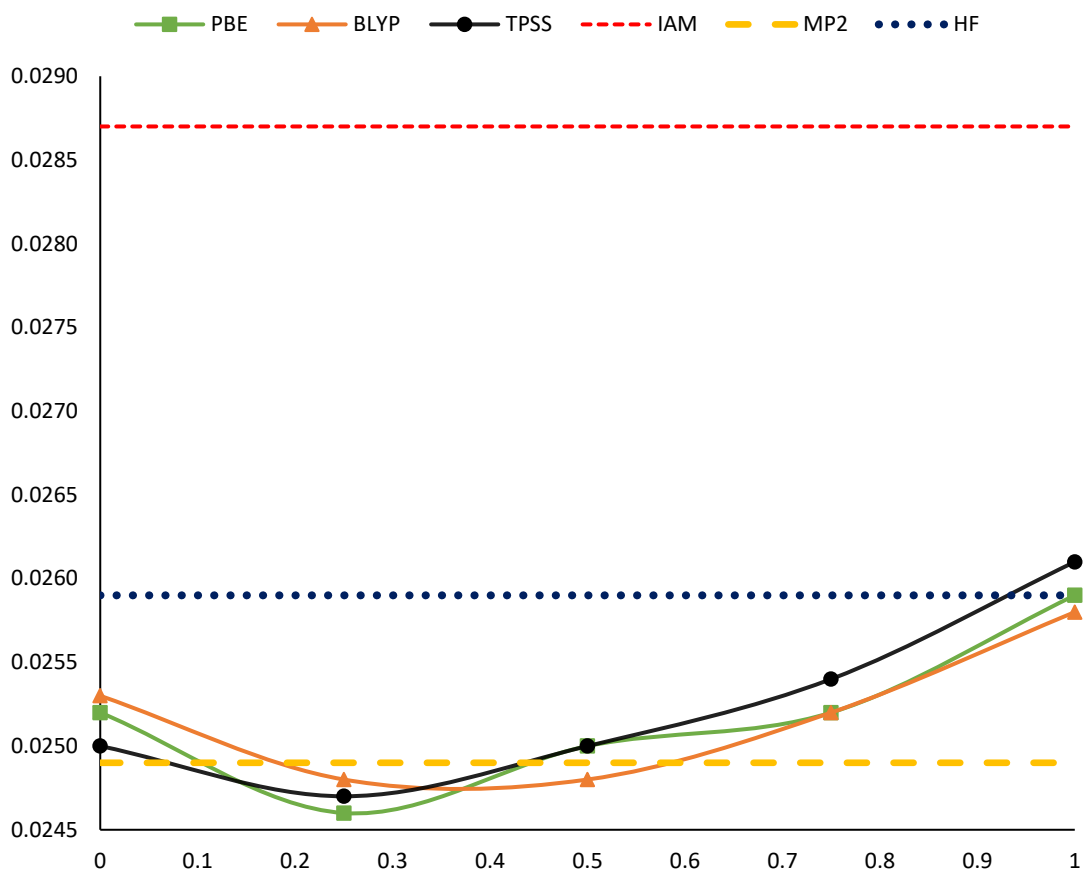

Figure S21. R1 of urea as a function of HF exchange refined with different level of theories. IAM value is shown as a dashed red line.

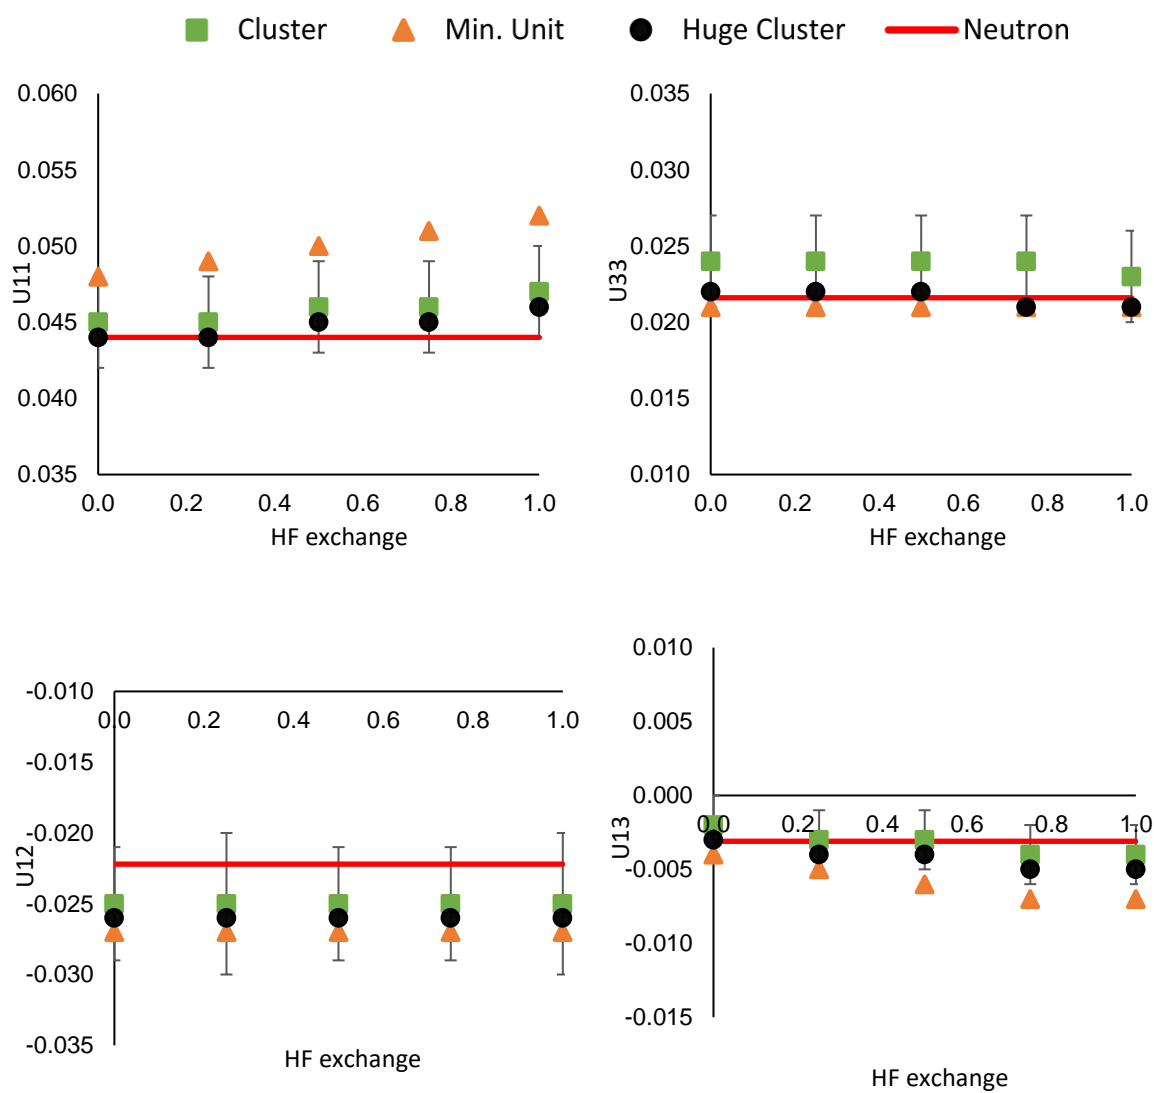

**Figure S22. Unique ADPs for H1 atom of urea as a function of HF exchange refined with clusters of different sizes. Neutron diffraction value is shown as a continue red line. The std errors of the reference refinement (PBE/def2-TZVP and Figure 1 cluster) are shown.**

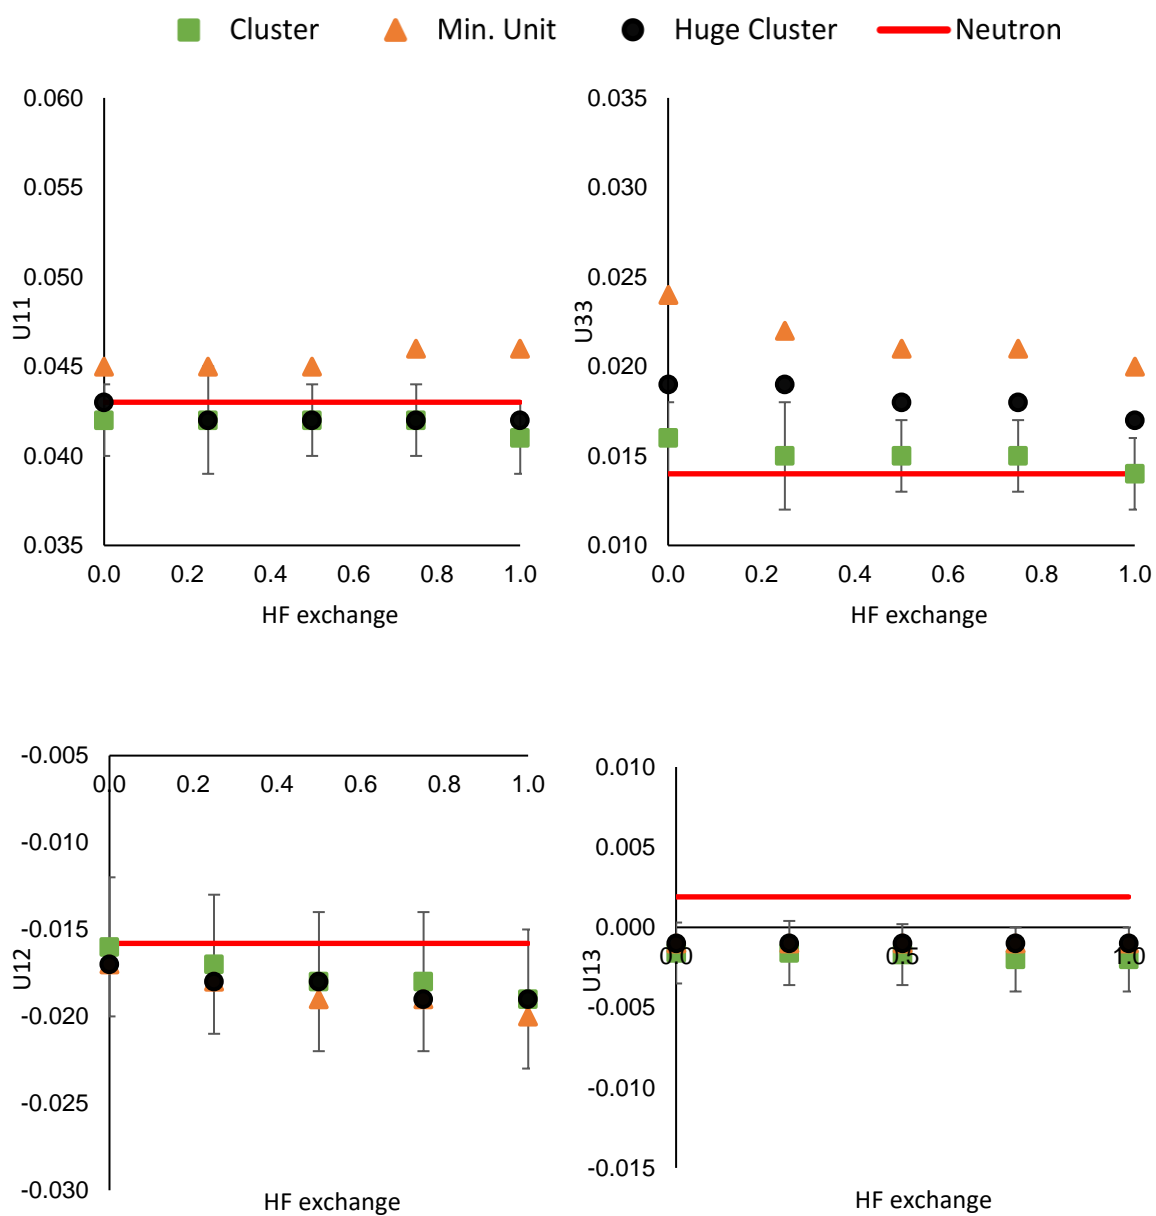

**Figure S23.** Unique ADPs for H2 atom of urea as a function of HF exchange refined with clusters of different sizes. Neutron diffraction value is shown as a continue red line. The std errors of the reference refinement (PBE/def2-TZVP and Figure 1 cluster) are shown.

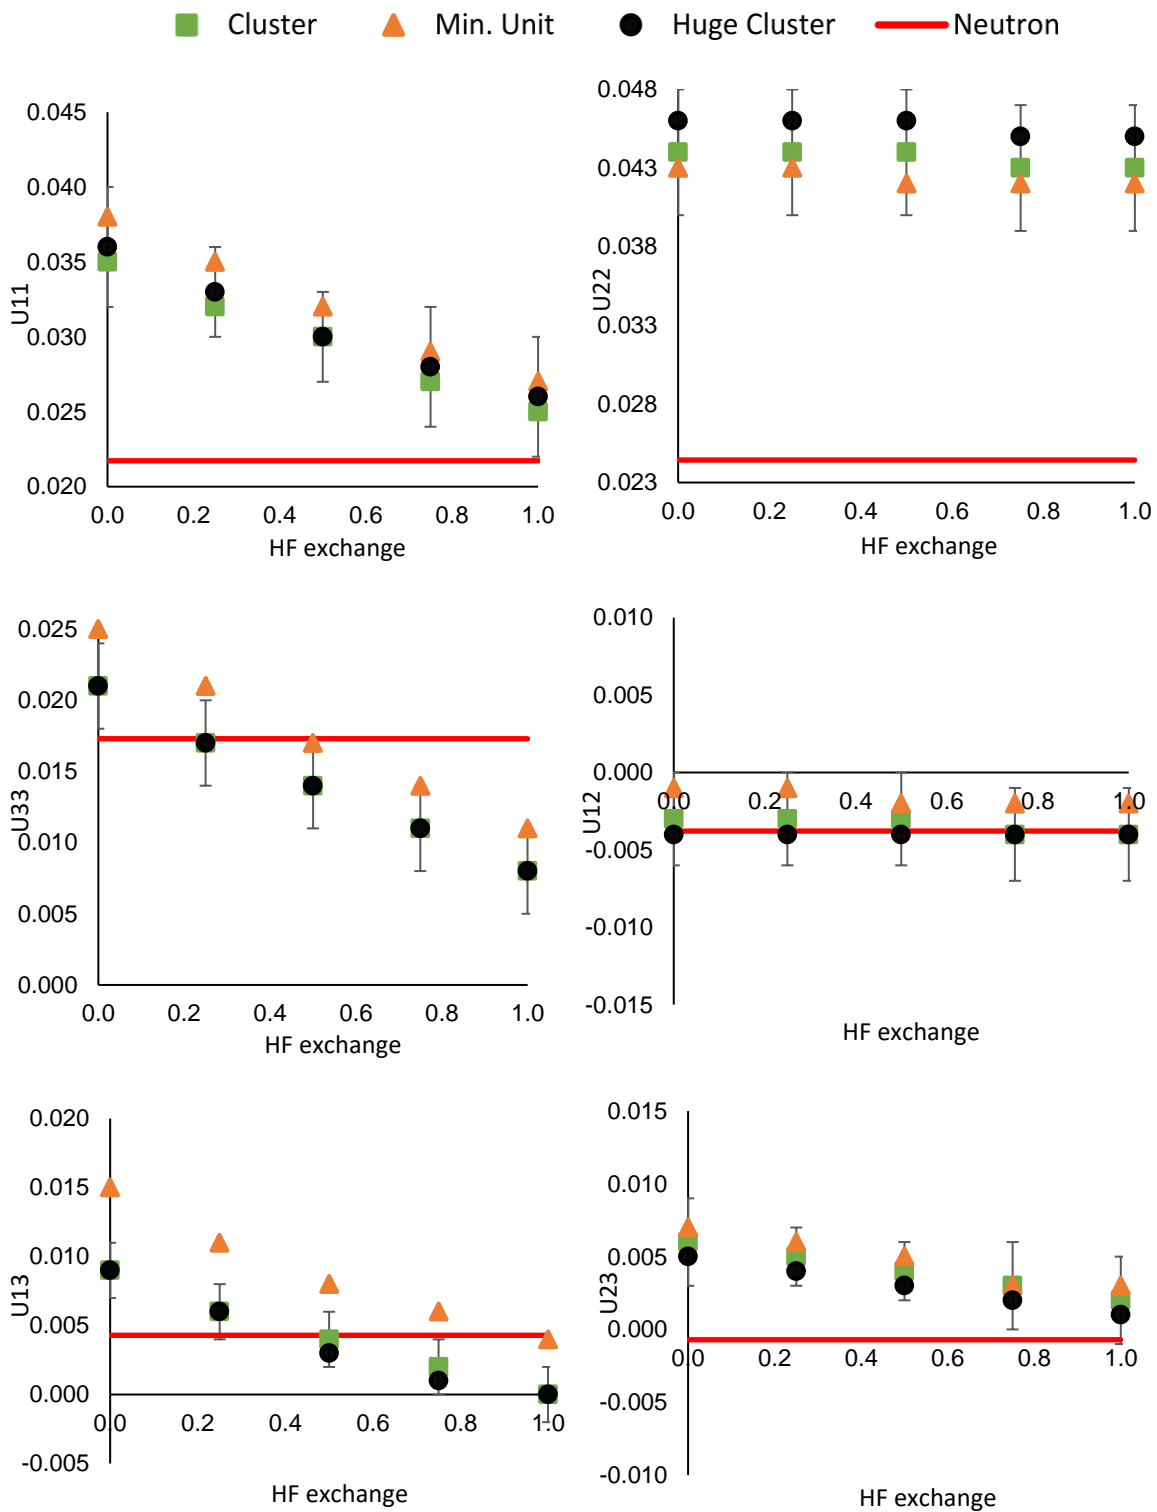

Figure S24. Unique ADPs for H1 atom of oxalic acid as a function of HF exchange refined with clusters of different sizes. Neutron diffraction value is shown as a continue red line. The std errors of the reference refinement (PBE<sub>ex</sub>/def2-TZVP and Figure 1 cluster) are shown.



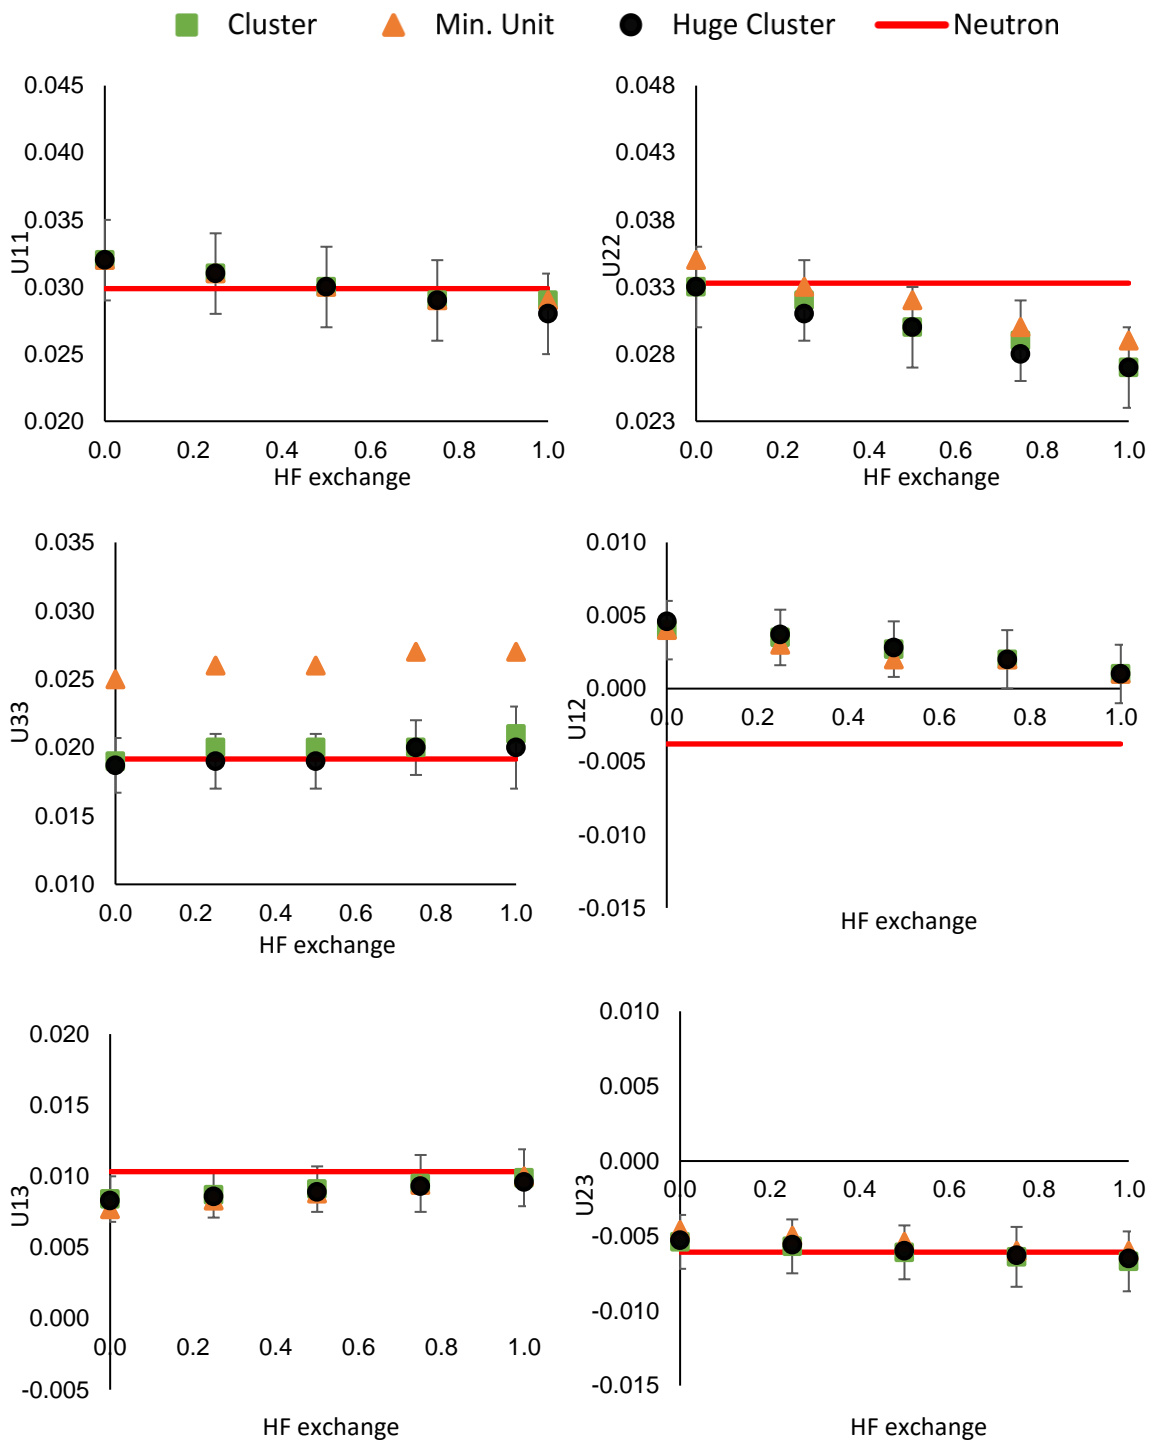

Figure S25. Unique ADPs for H2 atom of oxalic acid as a function of HF exchange refined with clusters of different sizes. Neutron diffraction value is shown as a continue red line. The std errors of the reference refinement (PBEx/def2-TZVP and Figure 1 cluster) are shown.

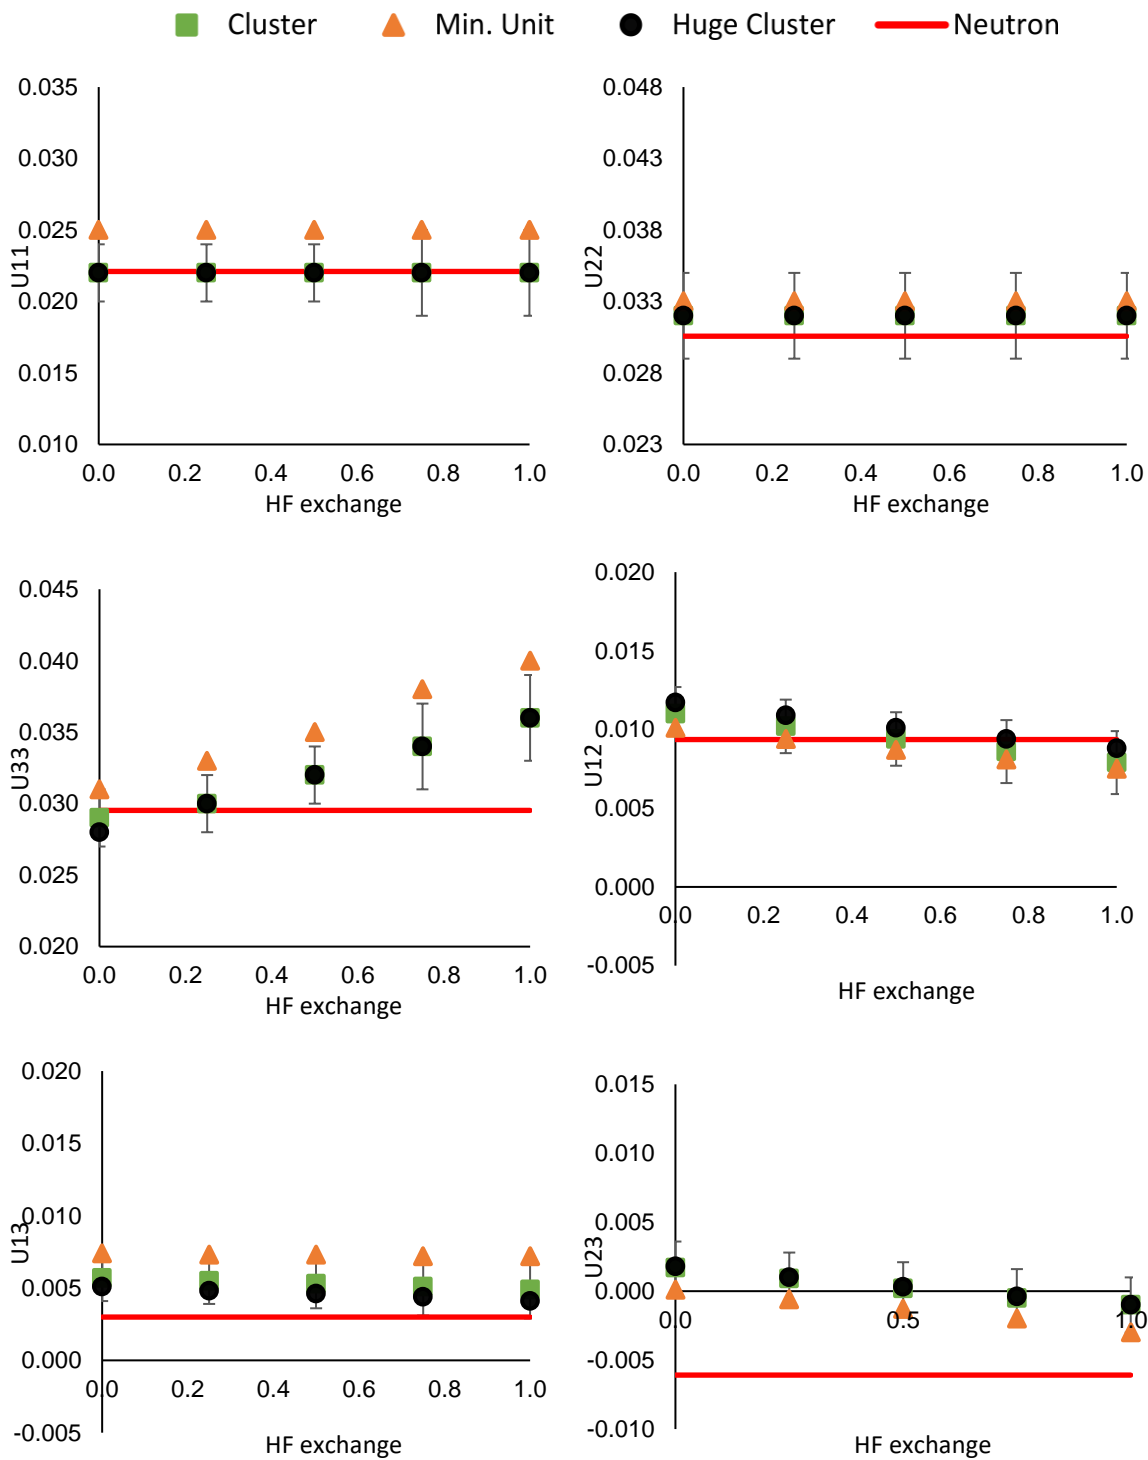

Figure S26. Unique ADPs for H3 atom of oxalic acid as a function of HF exchange refined with clusters of different sizes. Neutron diffraction value is shown as a continue red line. The std errors of the reference refinement (PBEx/def2-TZVP and Figure 1 cluster) are shown.

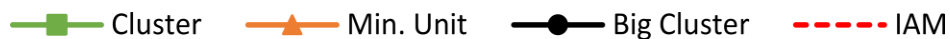

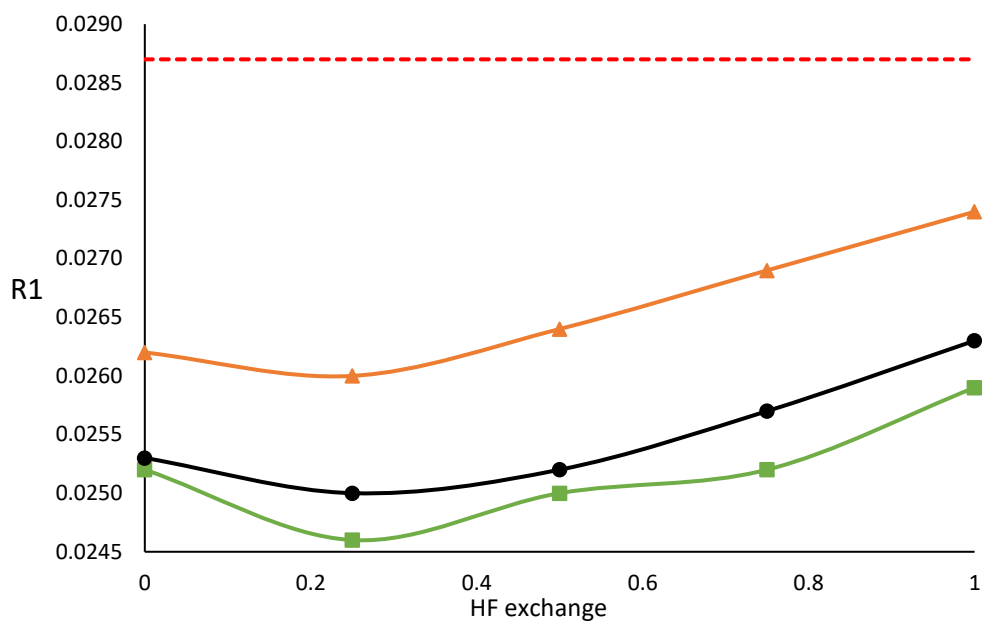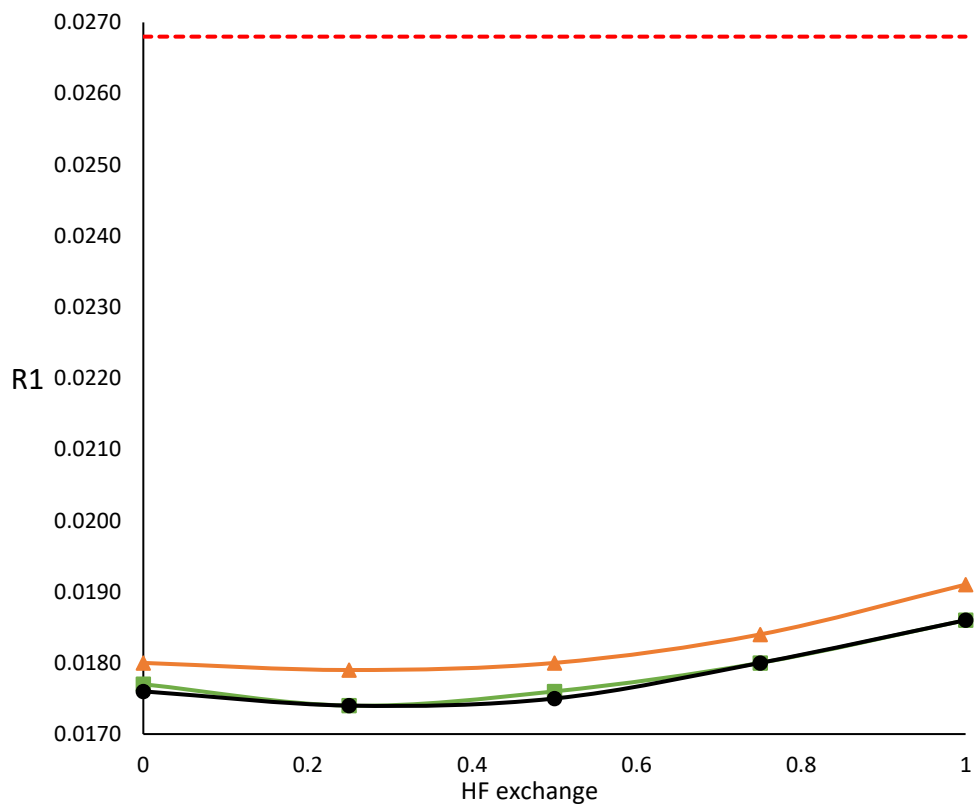

Figure S27. R1 of urea and oxalic acid as a function of HF exchange refined with clusters of different sizes at the PBE<sub>ex</sub>/def2-TZVP level of theory. IAM value is shown as a dashed red line.

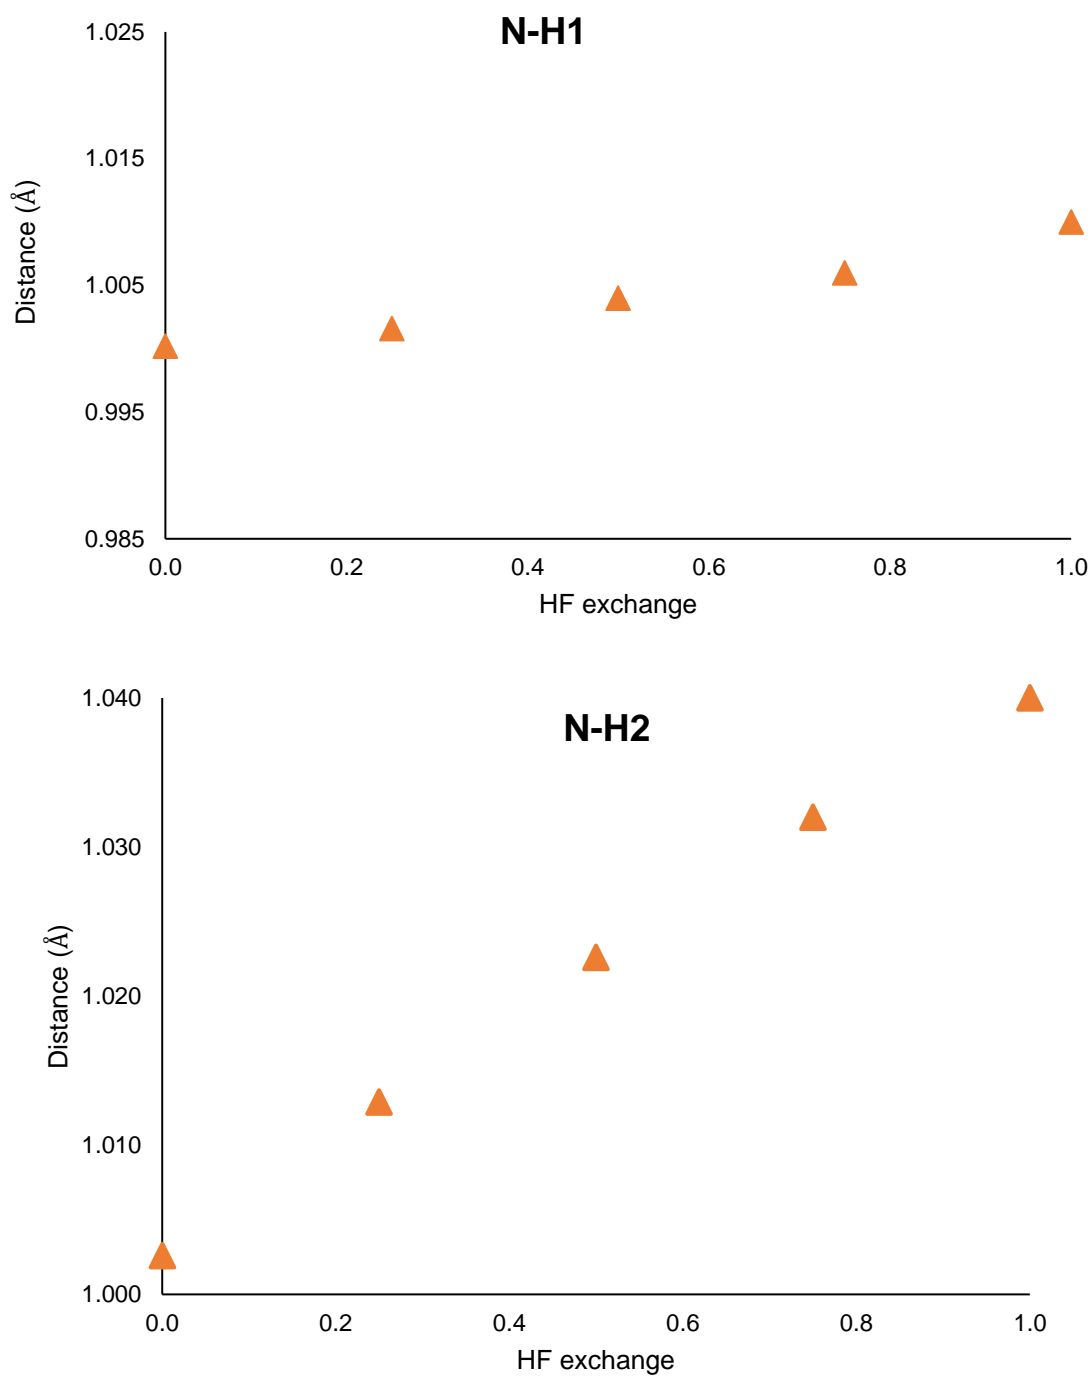

Figure S28. N-H1 and N-H2 distances obtained from HAR, using the theoretical structure factors.

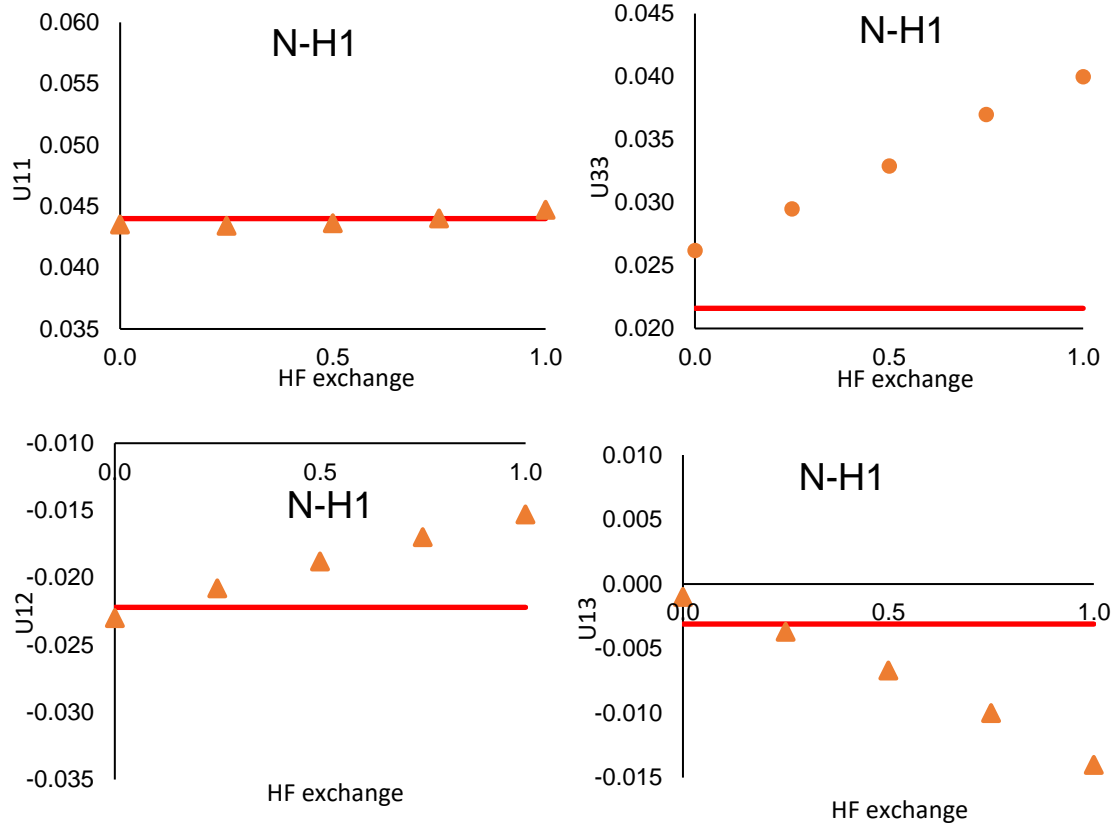

**Figure S29.** Unique ADPs for H1 atom of urea as a function of HF exchange, refined at PBE<sub>ex</sub>/def2-TVZP level of theory, using the theoretical structure factors. Neutron diffraction value is shown as a continue red line.

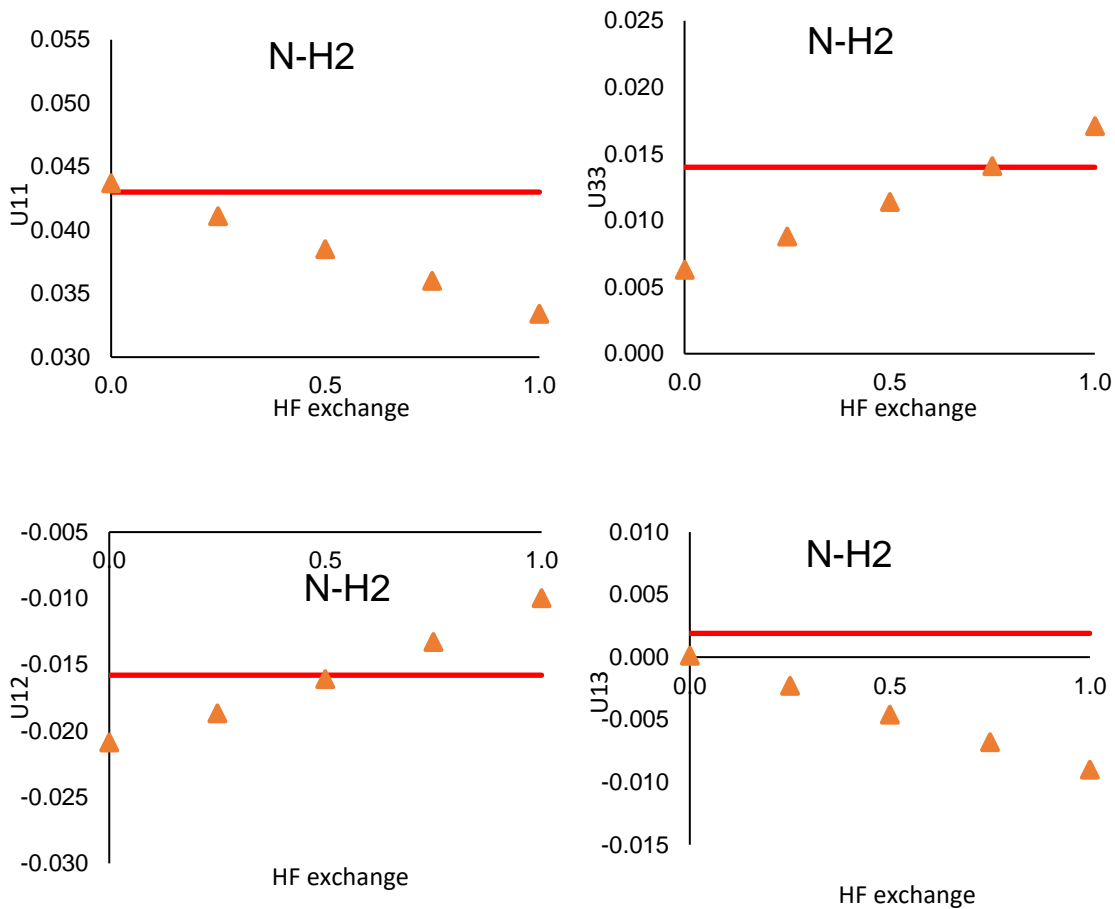

**Figure S30.** Unique ADPs for H<sub>2</sub> atom of urea as a function of HF exchange, refined at PBE<sub>x</sub>/def2-TVZP level of theory, using the theoretical structure factors. Neutron diffraction value is shown as a continue red line.

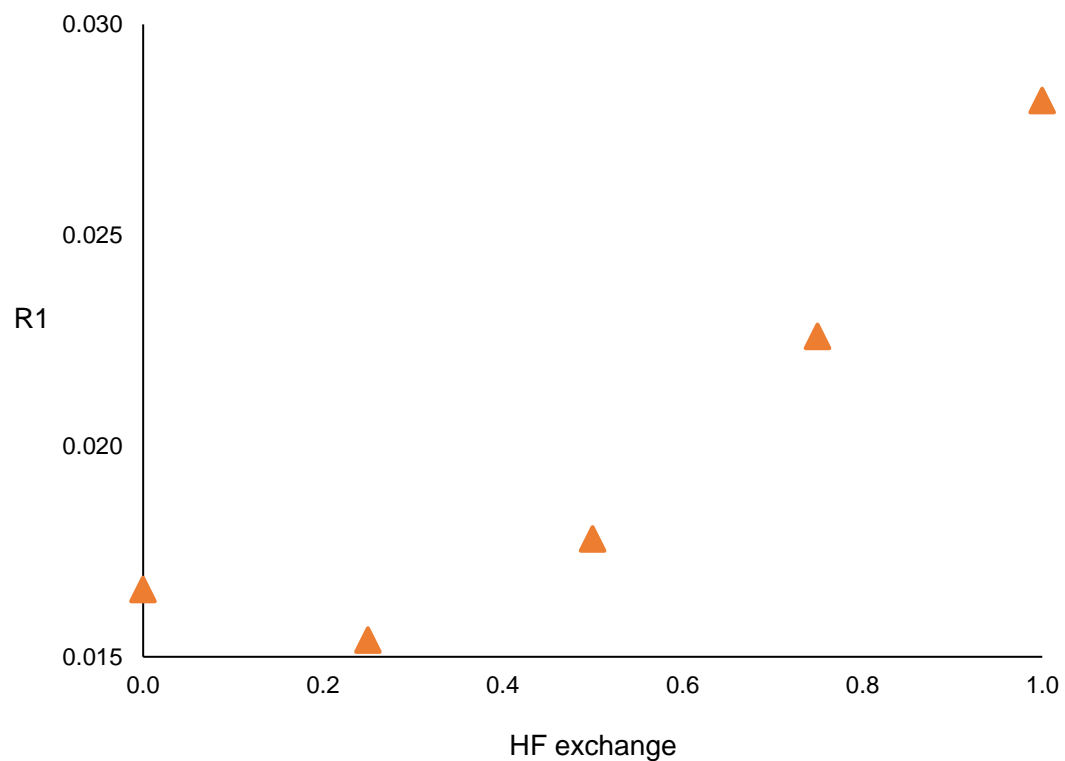

**Figure S31.** R1 of urea as a function of HF exchange, refined at PBE<sub>x</sub>/def2-TVZP level of theory, using the theoretical structure factors.

**Table S1.** QTAIM atomic charges and volumes (a. u.) of the atoms involved in the O1-H1...O3 hydrogen bond of oxalic acid for different methods and the cc-pVTZ basis set.

|        | Charges |      |       | Volume |       |        |
|--------|---------|------|-------|--------|-------|--------|
|        | O1      | H1   | O3    | O1     | H1    | O3     |
| PBE    | -1.15   | 0.64 | -1.20 | 129.45 | 10.05 | 148.02 |
| PBE50  | -1.30   | 0.71 | -1.32 | 131.17 | 7.88  | 149.50 |
| PBE100 | -1.44   | 0.77 | -1.41 | 132.30 | 5.83  | 150.71 |
| HF     | -1.43   | 0.77 | -1.38 | 133.91 | 6.05  | 151.33 |
| MP2    | -1.18   | 0.72 | -1.22 | 132.58 | 7.88  | 151.49 |
